# Supplementary material for: New (Iso)quinolinyl-pyridine-2,6-dicarboxamide G-Quadruplex Stabilizers. A Structure-Activity Relationship Study
Source: MDPI journal article supplement (doi:10.3390/ph14070669), 2021-07-13
Supplement: s1 [file s1]

# New (Iso)Quinoliny-Pyridine-2,6-dicarboxamide G-Quadruplex Stabilizers. A Structure-Activity Relationship Study

Enrico Cadoni <sup>1</sup>, Pedro R. Magalhães <sup>2</sup>, Rita Emídio <sup>2</sup>, Eduarda Mendes <sup>1,3</sup>, Jorge Vítor <sup>4</sup>, Josué Carvalho <sup>5</sup>, Carla Cruz <sup>5</sup>, Bruno L. Victor <sup>2</sup> and Alexandra Paulo <sup>1,3,\*</sup>

<sup>1</sup> Research Institute for Medicines (iMed.Ulisboa), Faculty of Pharmacy, Universidade de Lisboa, Av. Prof. Gama Pinto, 1649-003 Lisboa, Portugal;

<sup>2</sup> BioISI - Biosystems & Integrative Sciences Institute, Faculty of Sciences, University of Lisboa, Campo Grande, C8 bldg, 1749-016 Lisboa, Portugal

<sup>3</sup> Dep. of Pharmaceutical Sciences and Medicines, Faculty of Pharmacy, Universidade de Lisboa, Av. Prof. Gama Pinto, 1649-003 Lisboa, Portugal;

<sup>4</sup> Dep. of Pharmacy, Pharmacology and Health Technologies, Faculty of Pharmacy, Universidade de Lisboa, Av. Prof. Gama Pinto, 1649-003 Lisboa, Portugal;

<sup>5</sup> CICS-UBI - Centro de Investigação em Ciências da Saúde, Universidade da Beira Interior, Av. Infante D. Henrique, 6200-506, Covilhã, Portugal

\*Correspondence: mapaulo@ff.ulisboa.pt;

## Supplementary materials

|                                   |    |
|-----------------------------------|----|
| 1. General.....                   | 1  |
| 2. FRET melting experiments ..... | 2  |
| 3. CD Titrations.....             | 4  |
| 4. PCR-Stop assay .....           | 7  |
| 5. MM/PBSA calculations.....      | 8  |
| 6. NMR spectra .....              | 15 |
| 7. LC-MS Characterization.....    | 26 |
| 8. Supplemental references.....   | 30 |

## 1. General

All the reagents were purchased from Sigma-Aldrich and Merck and used without further purification.

NMR-Spectra were recorded on a Bruker 300 Ultrashield 300MHz, using 300 MHz scan for <sup>1</sup>H-NMR spectra and 75 MHz for <sup>13</sup>C.

Purity of compounds submitted to biophysical, biochemical or biological tests were in all cases > 90 % as determined by HPLC–MS (HPLC Waters Alliance 2695 coupled to a Photodiode Array Detector Waters 996 PDA and a Triple Quadrupole MS Micromass Quattro Micro API), using a Phenomenex Luna 5u HILIC 200A (100x3mm; 5µm) column and a ACN-HCOOH 0.5% (40:60) elution system at 0.2 ml/min.

## 2. FRET melting experiments

FRET melting assays were performed on a 7300 RT-PCR equipment from Applied Biosystems. The test compound solutions (50 µL) were distributed across 96-well RT-PCR plates (PCR-96-FLT-C, Axygen, Inc.). Experiments were performed in cacodylate buffer, 60 mM K<sup>+</sup>, pH 7.4, with 0.2 µM of oligonucleotide.

Standard and labelled HPLC-purified oligonucleotides were purchased from STABVIDA (Portugal), and sequences are depicted in table **S1**.

Table S1. Sequences used in FRET-melting experiments.

| Name             | Sequence                                                             | Topology                       | T <sub>m</sub> (°C) |
|------------------|----------------------------------------------------------------------|--------------------------------|---------------------|
| <i>k</i> -RAS    | 5'-FAM-AGGGCGGTGTGGGAAGAGGGA-TAMRA-3'                                | Parallel G4                    | 49.0 ± 0.2          |
| <i>h</i> -Telo   | 5'-FAM-GGGTTAGGGTTAGGGTTAGGG-TAMRA-3'                                | Hybrid G4                      | 56.9 ± 0.2          |
| <i>T</i> -Loop   | 5'-FAM-TATAGCTATATTTTTTATAGCTATA-TAMRA-3'                            | dsDNA                          | 53.2 ± 1.0          |
| 26merA<br>26merB | 5'-CAATCGGATCGAATTCGATCCGATTG-3'<br>5'-GTTAGCCTAGCTTAAGCTAGGCTAAG-3' | Self-hybridizing<br>duplex DNA |                     |

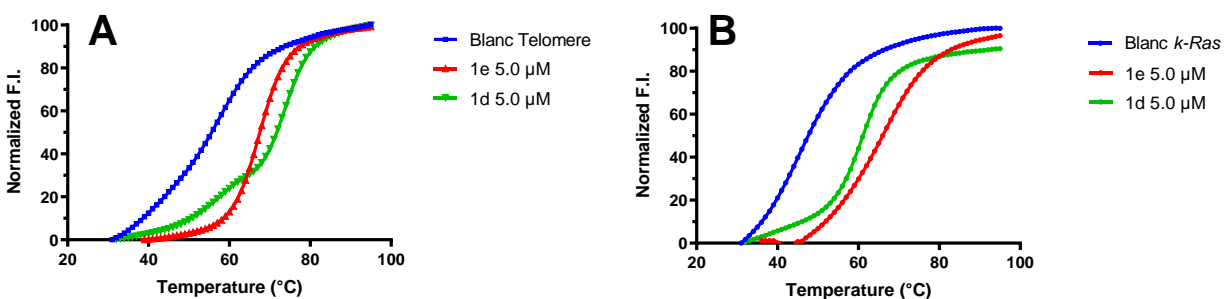

Figure S1. FRET-Melting curves of *h*-Telo (A, blue curve) and *k*-RAS (B, blue curve) in presence of compound **1e** (red curves) and **1d** (green curves) at 5 µM concentration (25 eq.).

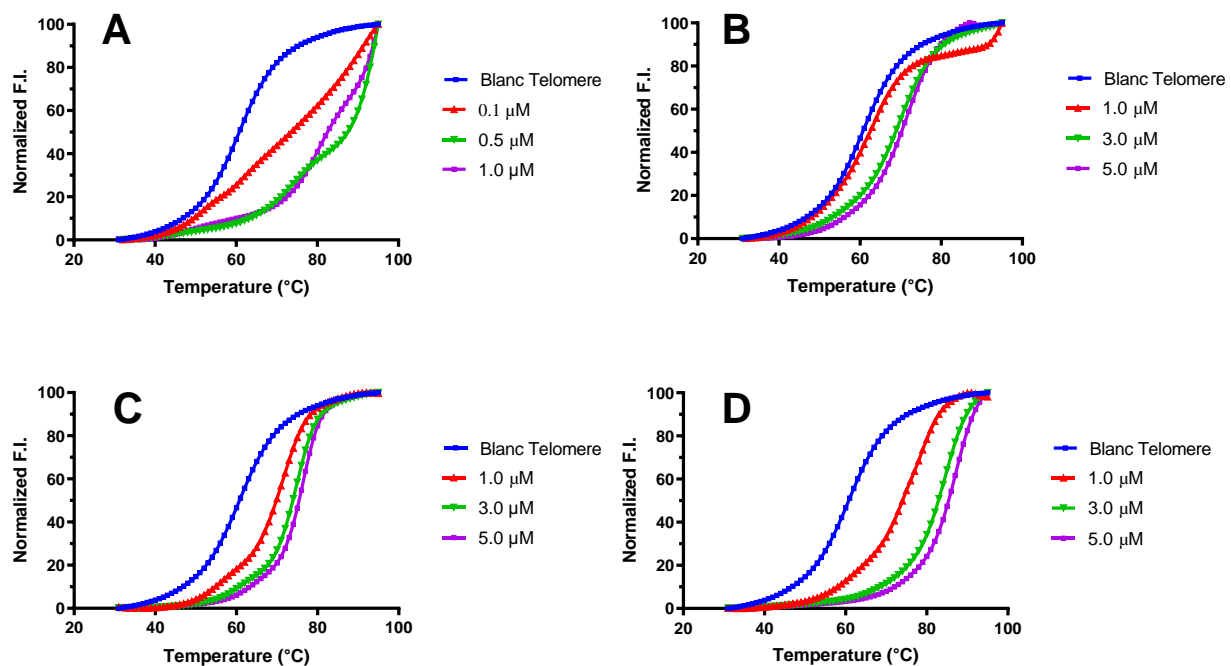

Figure S2. FRET-Melting curves of h-Telo (blue curves), in presence of increasing concentration of compounds **2a** (A), **2b** (B), **2c** (C) and **2d** (D).

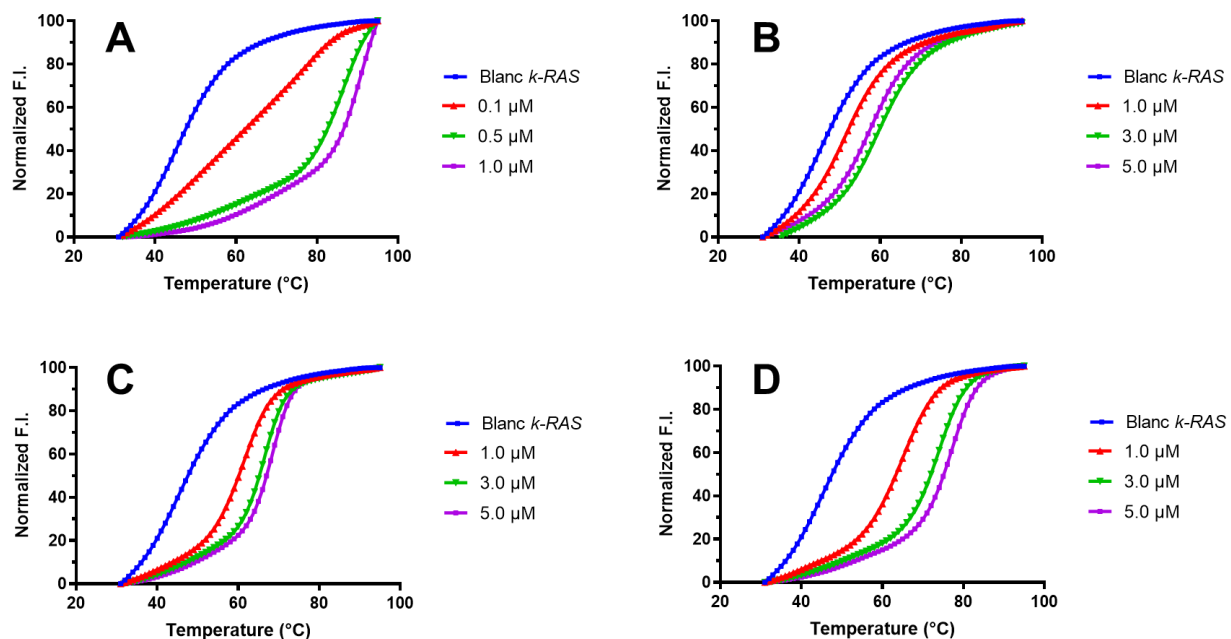

Figure S3. FRET-Melting curves of k-RAS (blue curves), in presence of increasing concentration of compounds **2a** (A), **2b** (B), **2c** (C) and **2d** (D).

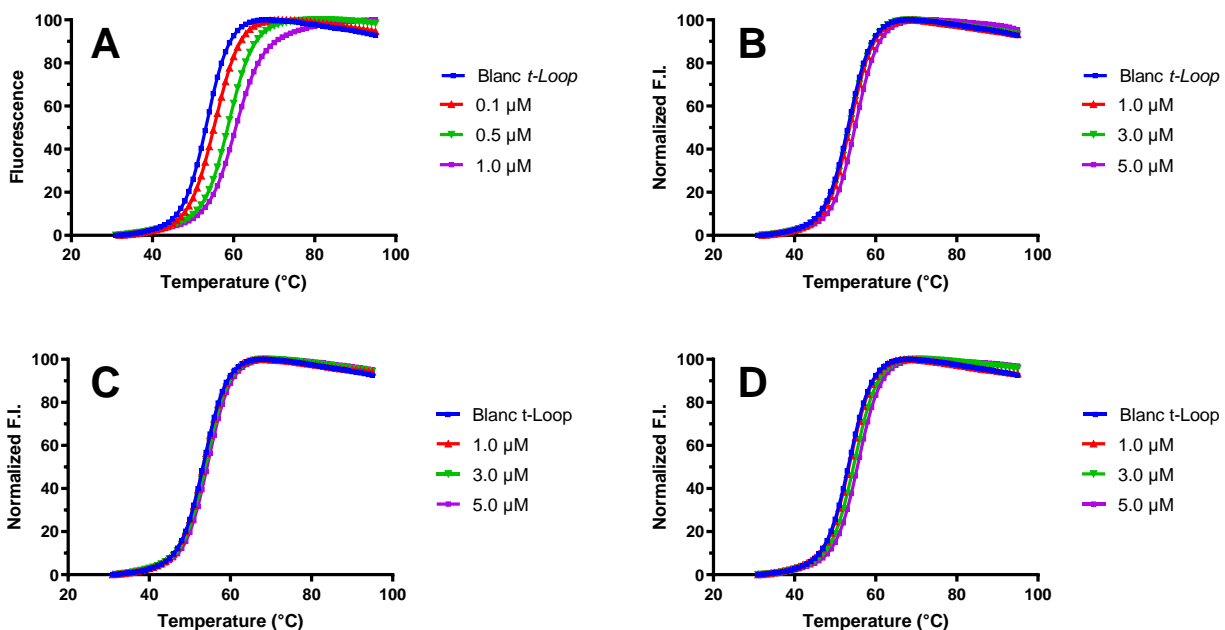

Figure S4. FRET-Melting curves of double-stranded t-Loop (blue curves), in presence of increasing concentration of compounds **2a** (A), **2b** (B), **2c** (C) and **2d** (D).

### 3. CD Titrations

CD titrations and melting assays were performed on Jasco J-815 spectropolarimeter equipped with a Peltier-type temperature control system (model CDF-426S/15), using an instrument scanning speed of 200 nm/min with a response time of 1 s in wavelengths ranging from 200 to 340 nm. CD-melting experiments were performed with 10  $\mu$ M of oligonucleotide in 20 mM lithium cacodylate buffer supplemented with KCl and LiCl as described in Material and Methods (& 4.4), keeping a constant ionic strength of 100 mM. The DNA sequences used for the experiments, and their respective melting temperatures are depicted in table S2.

Table S2. Sequences used in CD experiments.

| Name           | Sequence                          | Topology    | T <sub>m</sub> (°C) |
|----------------|-----------------------------------|-------------|---------------------|
| <i>k</i> -RAS  | 5'-AGGGCGGTGTGGGAAGAGGGA-3'       | Parallel G4 | 48.3 $\pm$ 0.2      |
| <i>H</i> -Telo | 5'-GGGTTAGGGTTAGGGTTAGGG-3'       | Hybrid G4   | 59.6 $\pm$ 0.9      |
| <i>c</i> -MYC  | 5'-TGGGGAGGGTGGGGAGGGTGGGGAAGG-3' | Parallel G4 | 50.4 $\pm$ 1.9      |

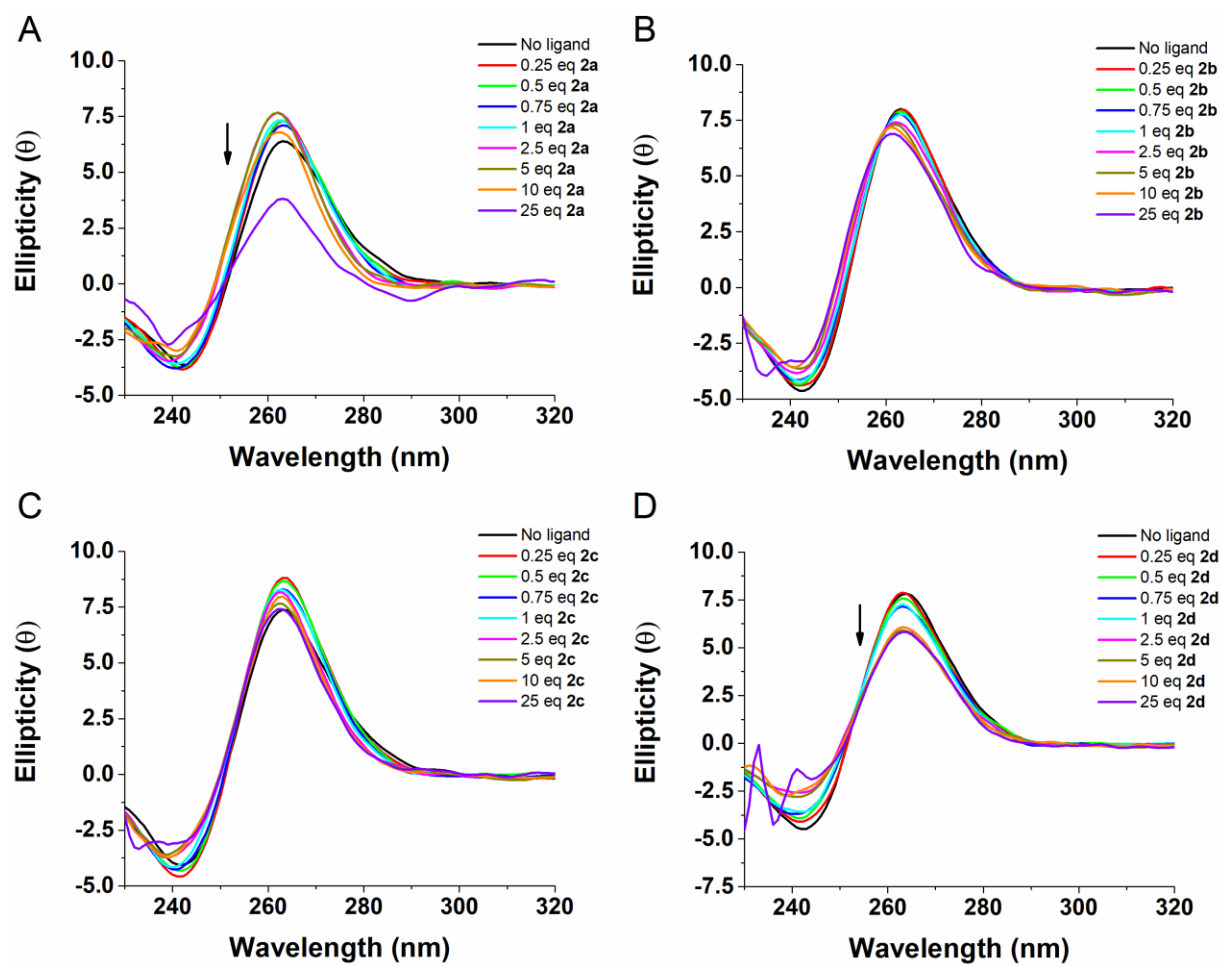

Figure S5. CD titration of c-MYC in presence of increasing equivalents (0-25) of compound 2a (A), 2b (B), 2c (C), 2d (D), at a concentration of 10  $\mu$ M, performed in 20 mM lithium cacodylate containing 100 mM LiCl.

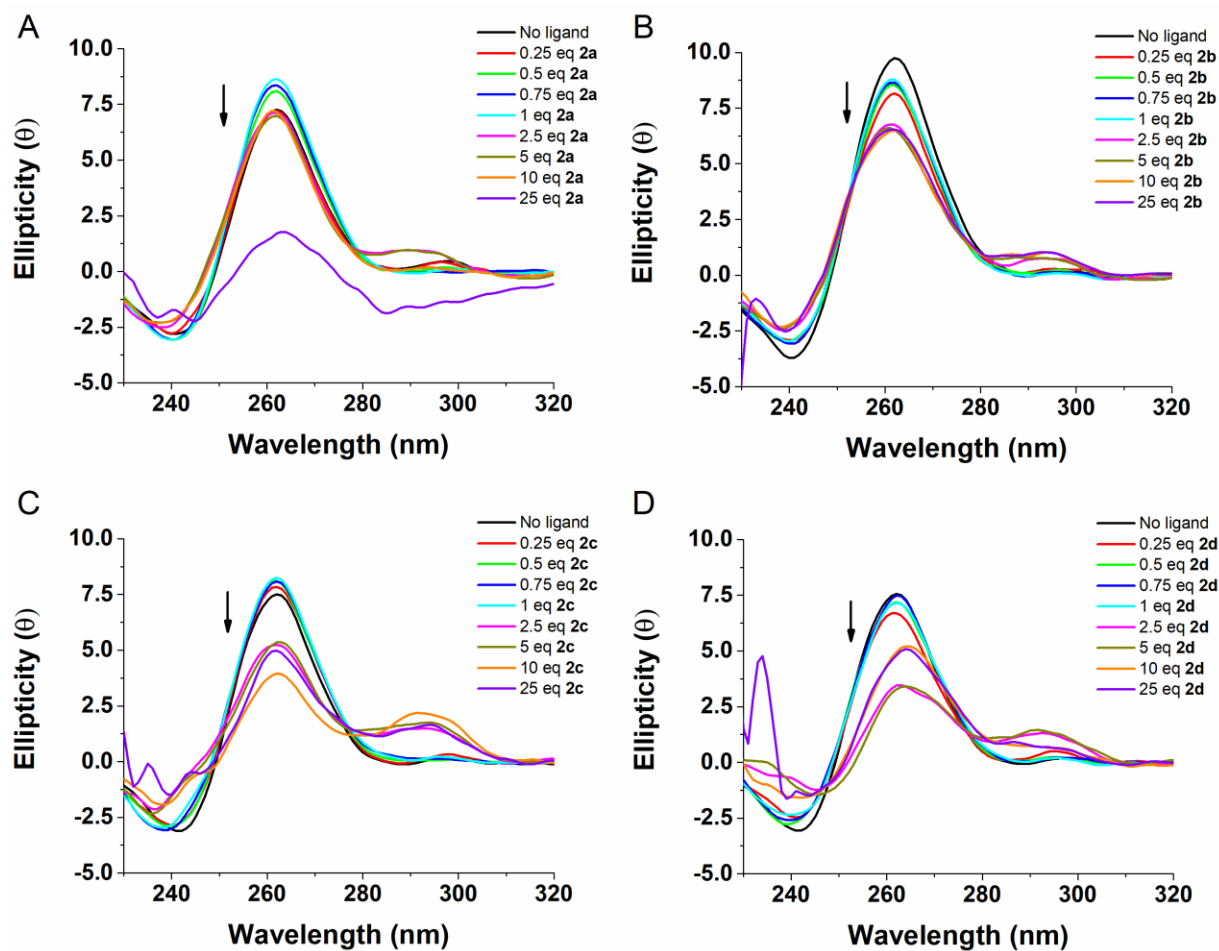

Figure S6. CD titration of *k*-RAS in presence of increasing equivalents (0-25) of compound 2a (A), 2b (B), 2c (C), 2d (D), at a concentration of 10  $\mu$ M, performed in 20 mM lithium cacodylate containing 50 mM KCl and 50 mM LiCl.

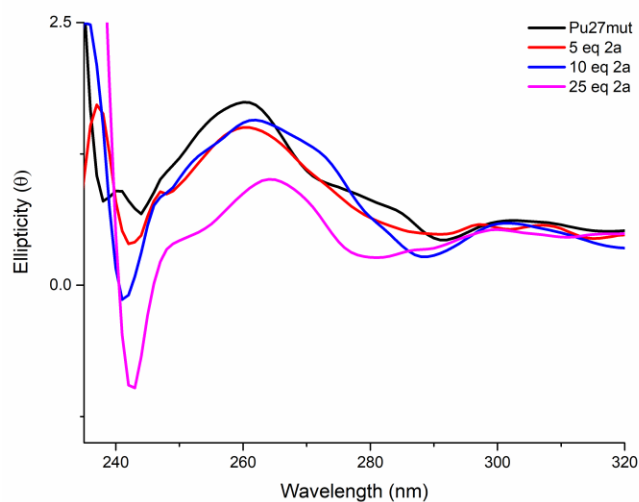

Figure S7. CD titration of c-MYC Pu27mut (sequence in table S3) in presence of increasing equivalents of compound 2a, performed in ThermoPol buffer (20mM Tris-HCl, 10mM  $(\text{NH}_4)_2\text{SO}_4$ , 10mM KCl, 2mM  $\text{MgSO}_4$ , 0.1% Triton<sup>®</sup> X100, pH 8.8).

## 4. PCR-Stop assay

The primer sequences used in PCR-stop assay are depicted in table S3. Sequence-design was adapted from [1].

Table S3. Sequences used in PCR-stop assay

| Name     | Sequence                          |
|----------|-----------------------------------|
| Pu27     | 5'-TGGGGAGGGTGGGGAGGGTGGGGAAGG-3' |
| Pu27mut  | 5'-TGGGGAGGGTGGAAAGGGTGGGGAAGG-3' |
| Pu27REV  | 5'-ATCGAATCGCTTCTCGTCCTTCCCCA-3'  |
| Pu27mut2 | 5'-TGGGGAGGGTGGAAAGGGTTTGAAGG-3'  |
| Pu27REV2 | 5'-ATCGATCGCTTCTCGTCCTTCCAAA-3'   |

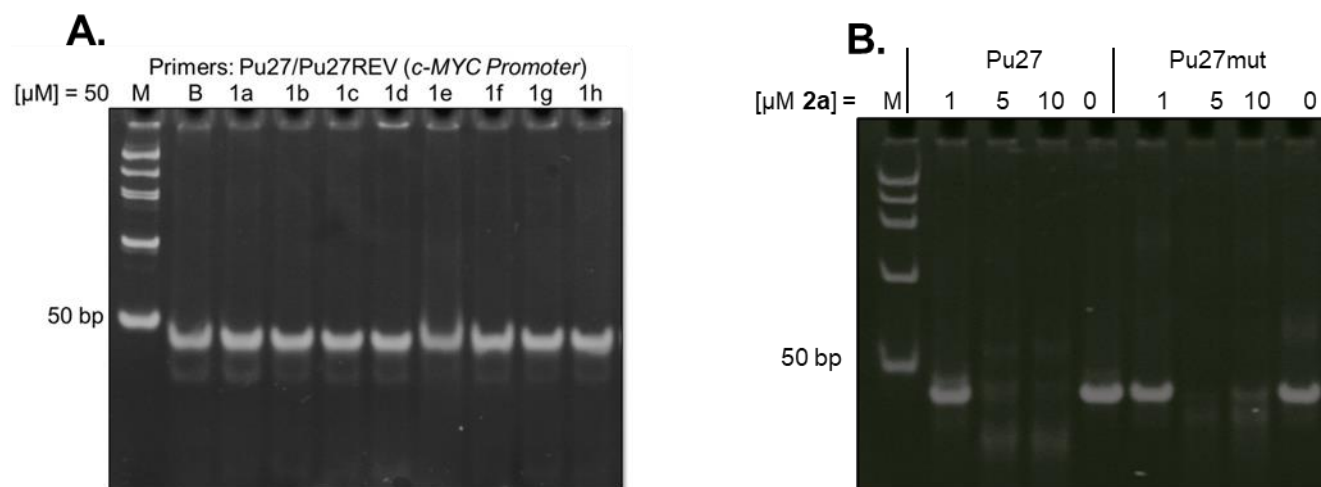

Figure S8. A) Results of PCR-stop assay with compounds **1a-h** at 50  $\mu$ M and c-MYC gene promoter Pu27. B) Results of PCR-stop assay with compound **2a** and c-MYC gene promoter Pu27 or with mutated c-MYC gene promoter (Pu27mut). In absence of compound, the 43 bp PCR products from constructions with Pu27 is formed.

## 5. MM/PBSA calculations

The equation used to determine the binding free energy of the ligands to the quadruplex is expressed as:

$$\Delta G_{bind} = \Delta G_{complex}^{vdW} + \Delta G_{complex}^{ele} + \Delta G^{polar} + \Delta G^{nonpolar} \quad (\text{eq 1})$$

with  $V_{complex}^{vdW}$  and  $V_{complex}^{ele}$  being the quadruplex–ligand van der Waals and electrostatic interaction energies, respectively. The polar and the nonpolar contributions are expressed as

$$\Delta G^{polar} = G_{complex}^{polar} - (G_{protein}^{polar} + G_{ligand}^{polar}) \quad (\text{eq 2})$$

and

$$\Delta G^{nonpolar} = G_{complex}^{nonpolar} - (G_{protein}^{nonpolar} + G_{ligand}^{nonpolar}) \quad (\text{eq 3})$$

The Poisson–Boltzmann (PB) equation for the polar term is evaluated using the following equation:

$$\nabla \cdot [\epsilon(r) \nabla \cdot \phi(r)] - \epsilon(r) k(r)^2 \sinh[\phi(r)] + \frac{4\pi \rho^f(r)}{k_B T} = 0 \quad (\text{eq 4})$$

where  $\phi(r)$  corresponds to the ligand's electrostatic potential,  $\epsilon(r)$  the dielectric constant, and  $\rho^f(r)$  the fixed charge density. Since the polar solvation energy is known to depend on the chosen value for the dielectric constant  $\epsilon_{solute}$  of the complex [2], several values (2, 4 and 8) were evaluated to inspect its effect on predicted  $\Delta G_{bind}$  values. By default,  $\epsilon_{solute}$  is set to 2, but ultimately, we have used a value of 8 which showed to be the most adequate to use for our system. All the other settings in `g_mmpbsa` were left unaltered (i.e., use of atomic radii as proposed by Bondi [3], linear PB equation solver, 0.05 nm grid resolution, and smoothed van der Waals surface).

To estimate nonpolar solvation energies, we have used a linear dependence of  $G_{nonpolar}$  on the SASA, expressed as follows [4]:



$$G^{nonpolar} = \gamma_{surf}SASA + b \quad (\text{eq 5})$$

where  $\gamma_{surf}$  is related to the surface tension of the solvent. A solvent probe radius of 0.14 nm was used to determine the SASA.

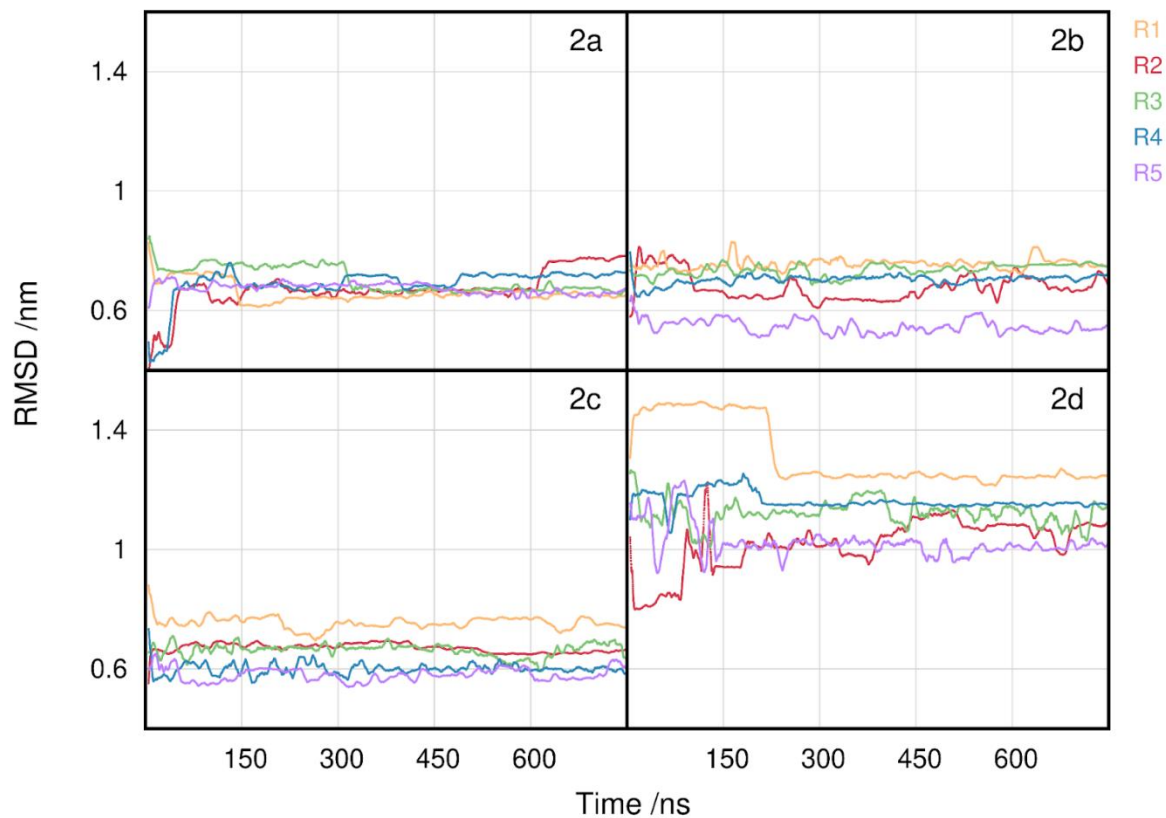

Figure S9. Root mean square deviation (RMSD) of the complex k-RAS + ligand, throughout the simulation time for each replicate simulation.

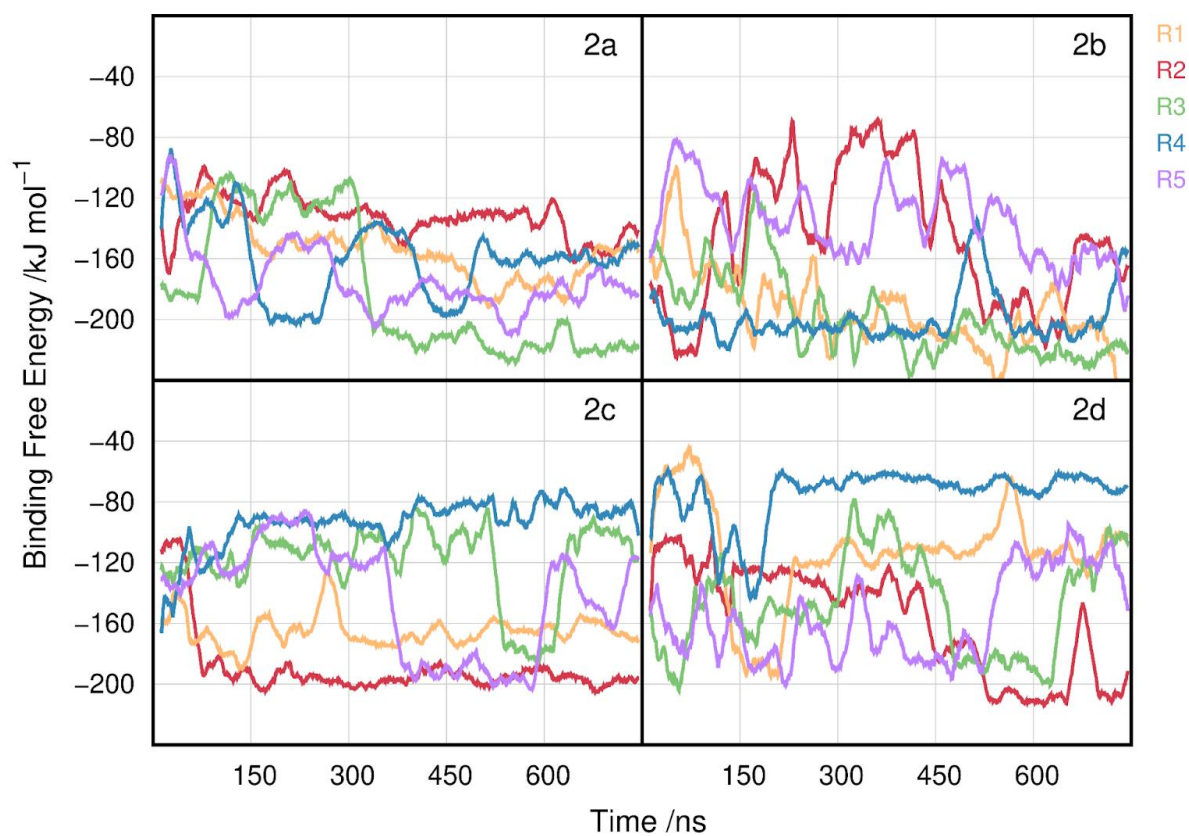

Figure S10. Variation of the MM/PBSA binding free energy between the different ligands and k-RAS for each replicate simulation.

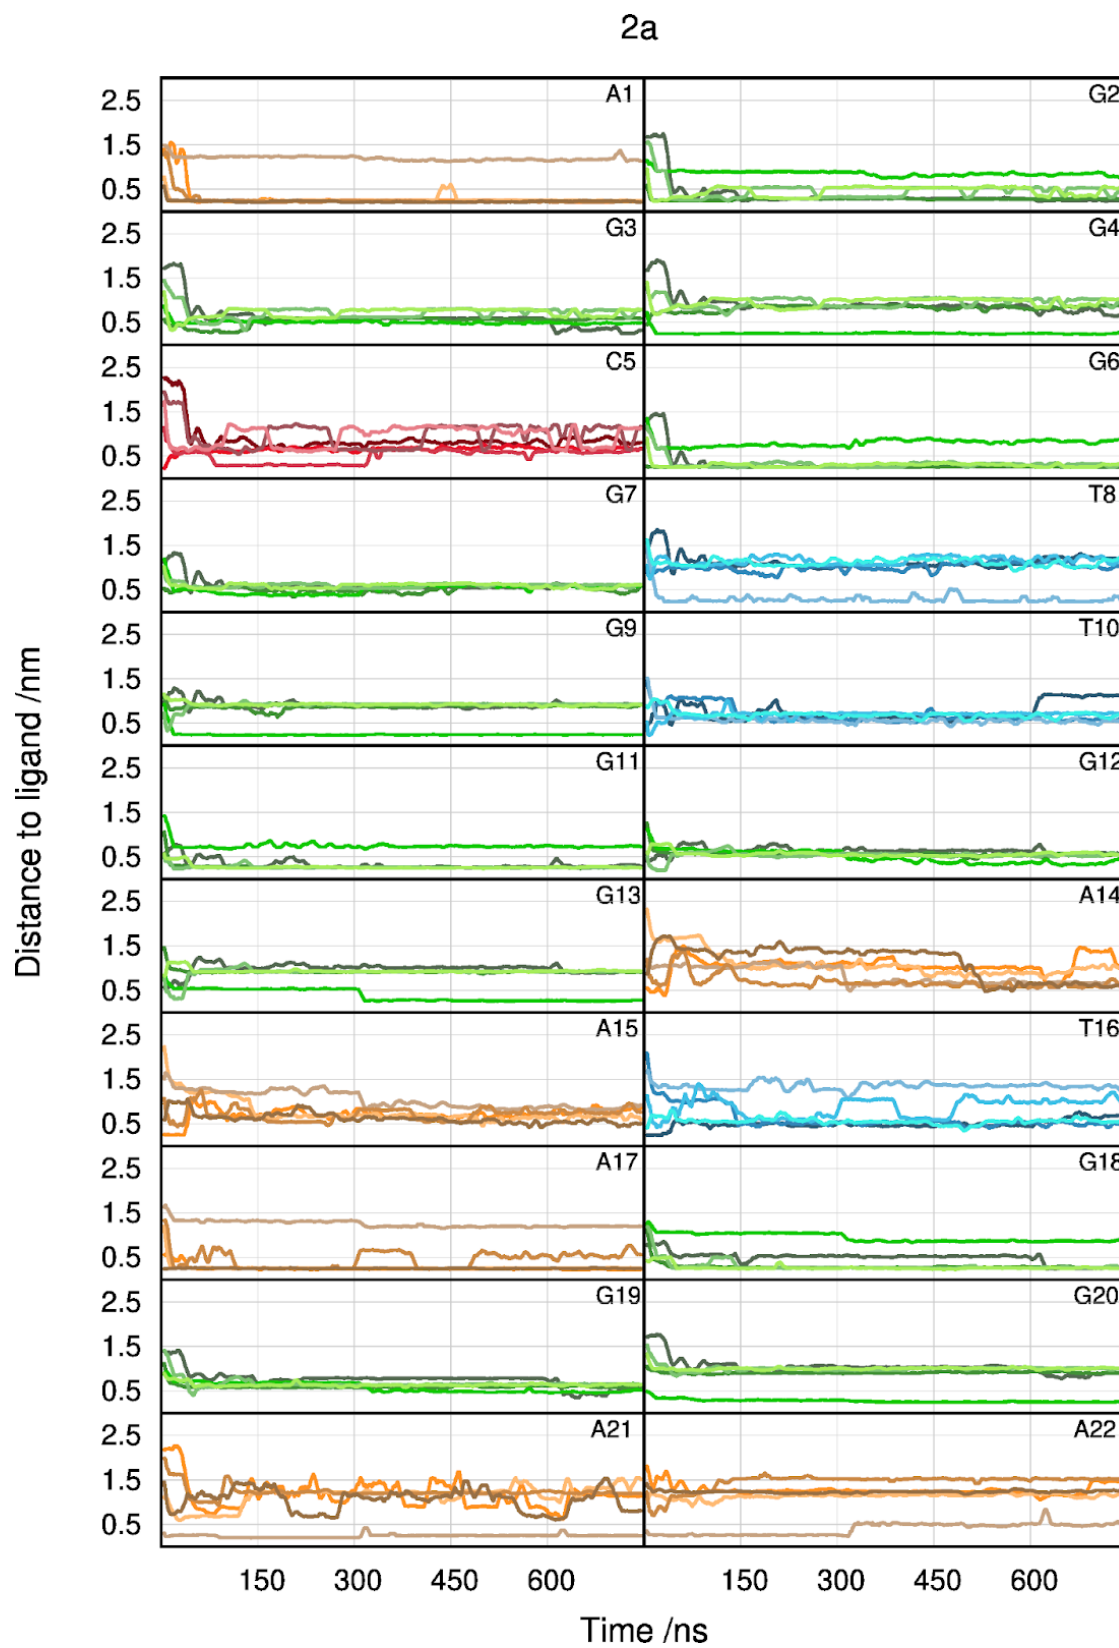

Figure S11. Minimum distance of compound 2a to each pair of bases of k-RAS for all replicate simulations.

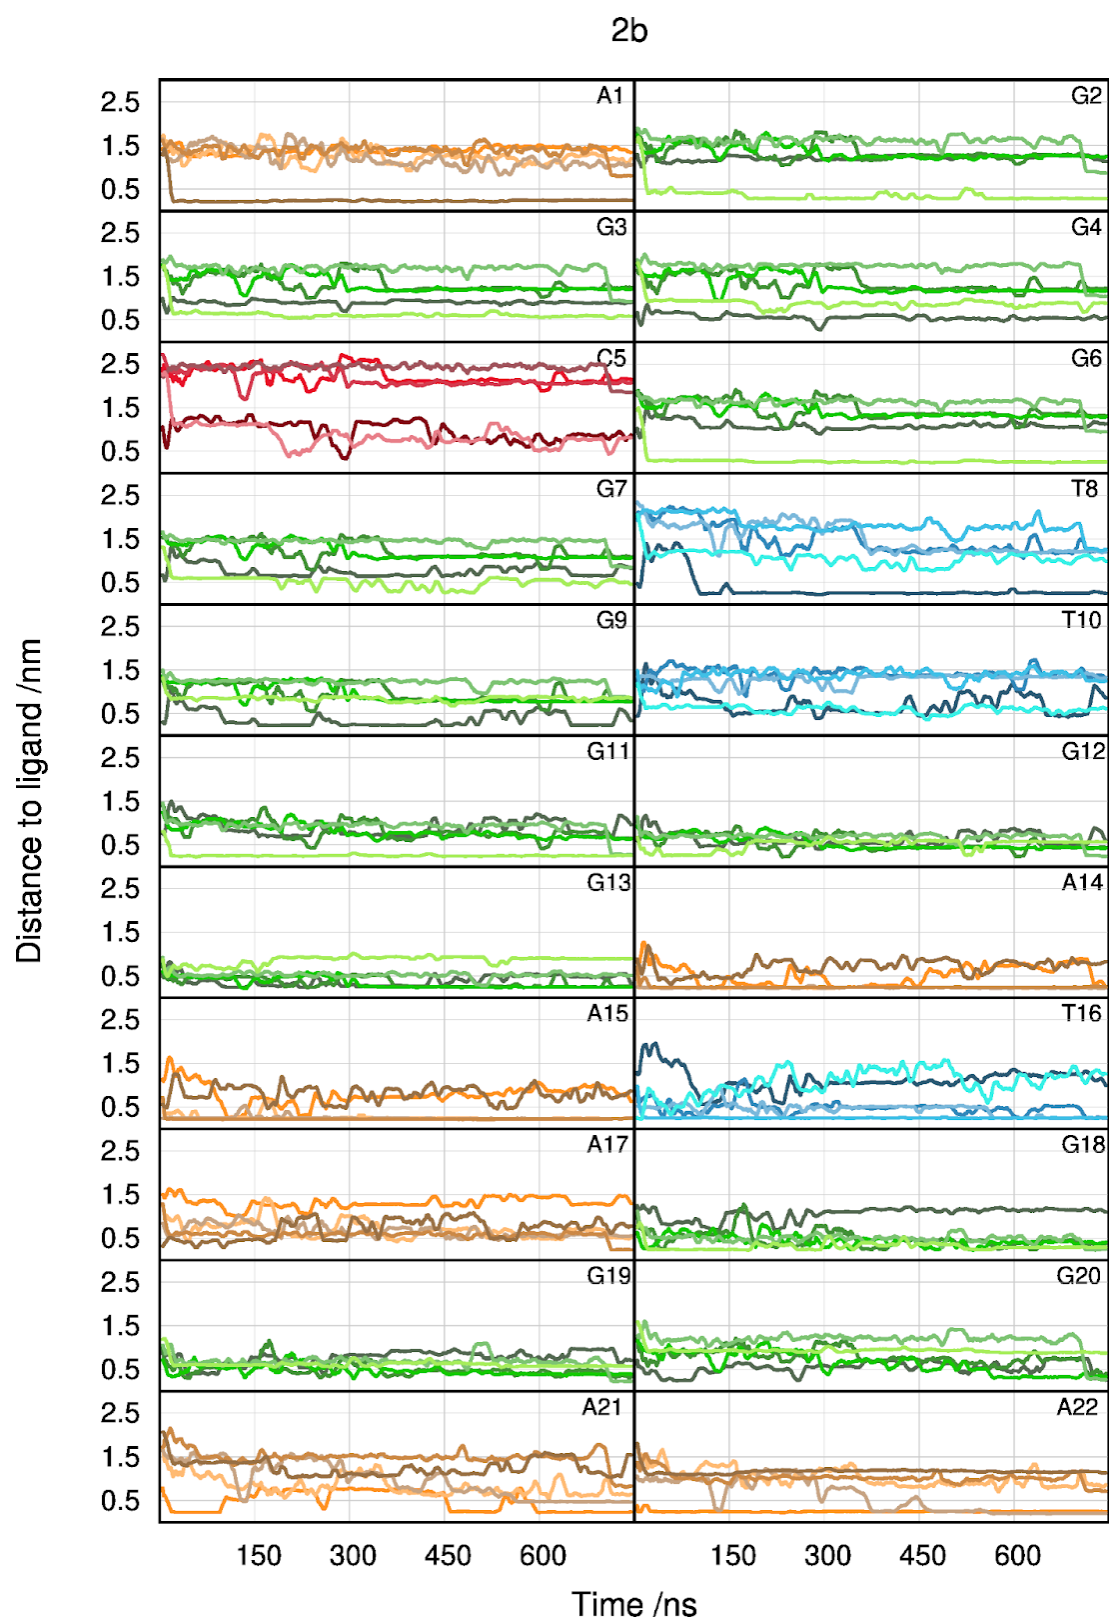

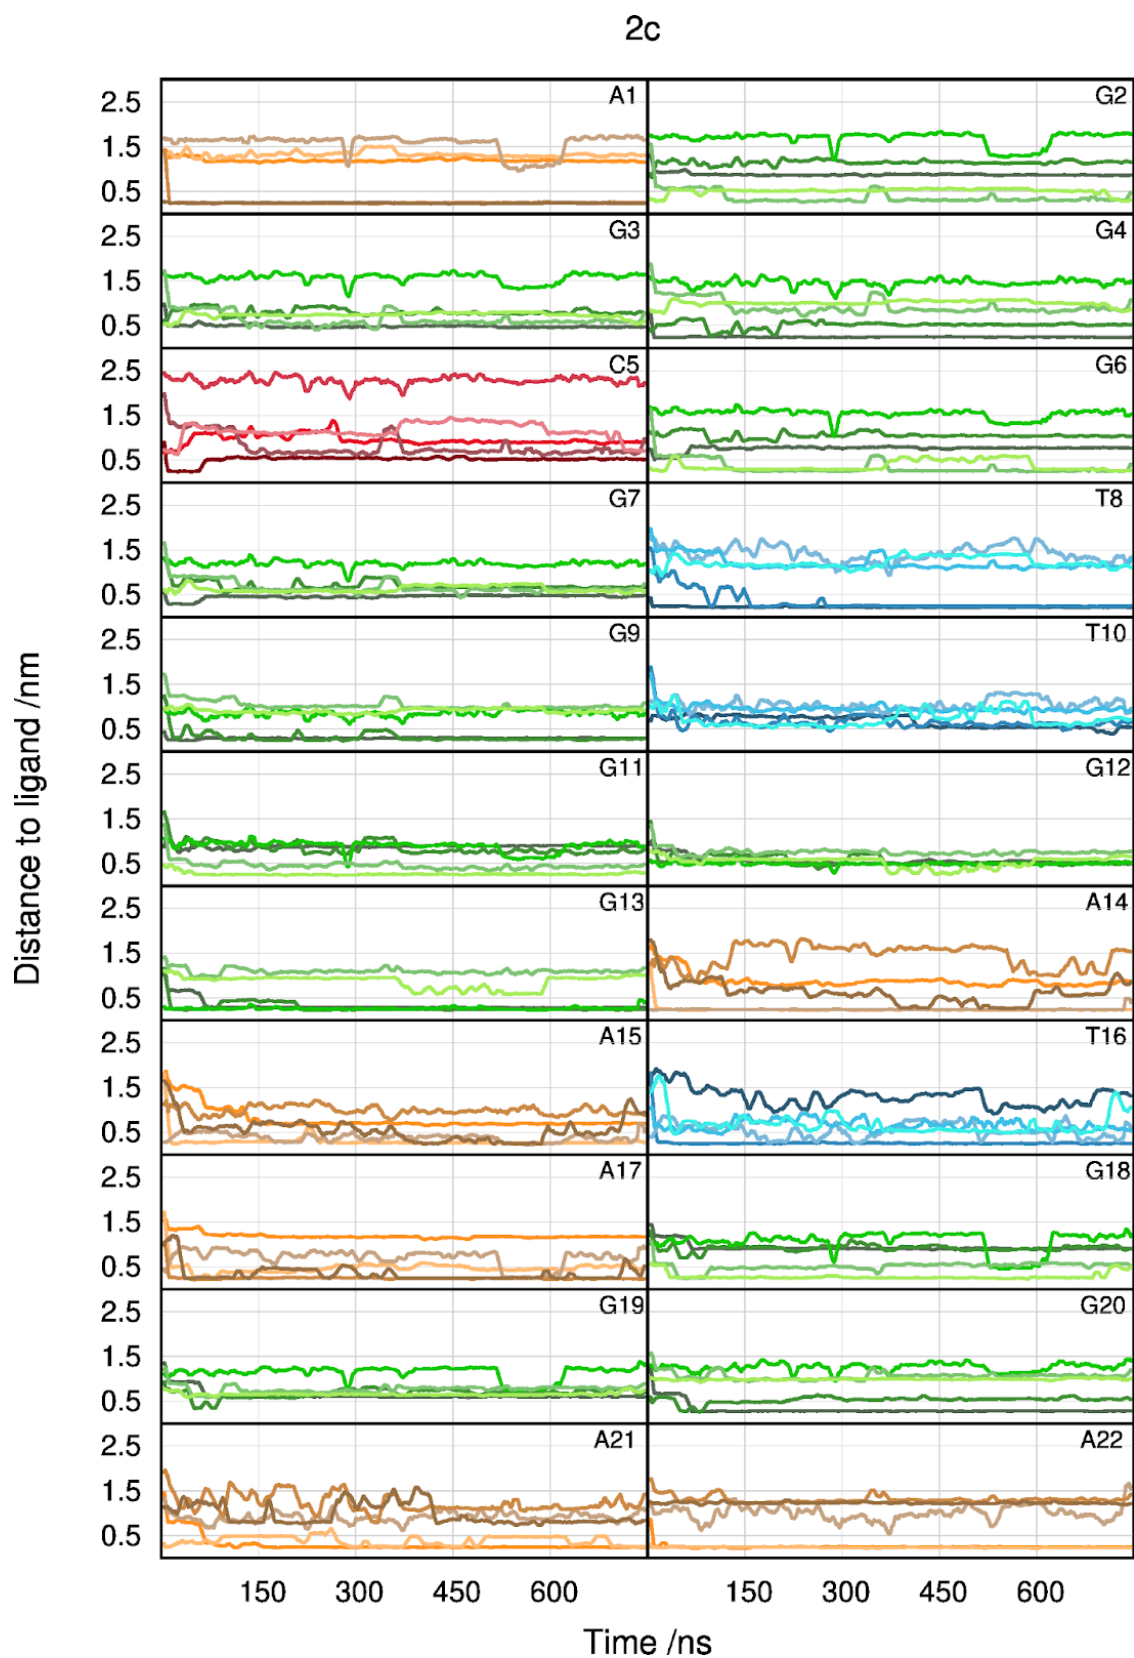

Figure S13. Minimum distance of compound 2c to each pair of bases of k-RAS for all replicate simulations.



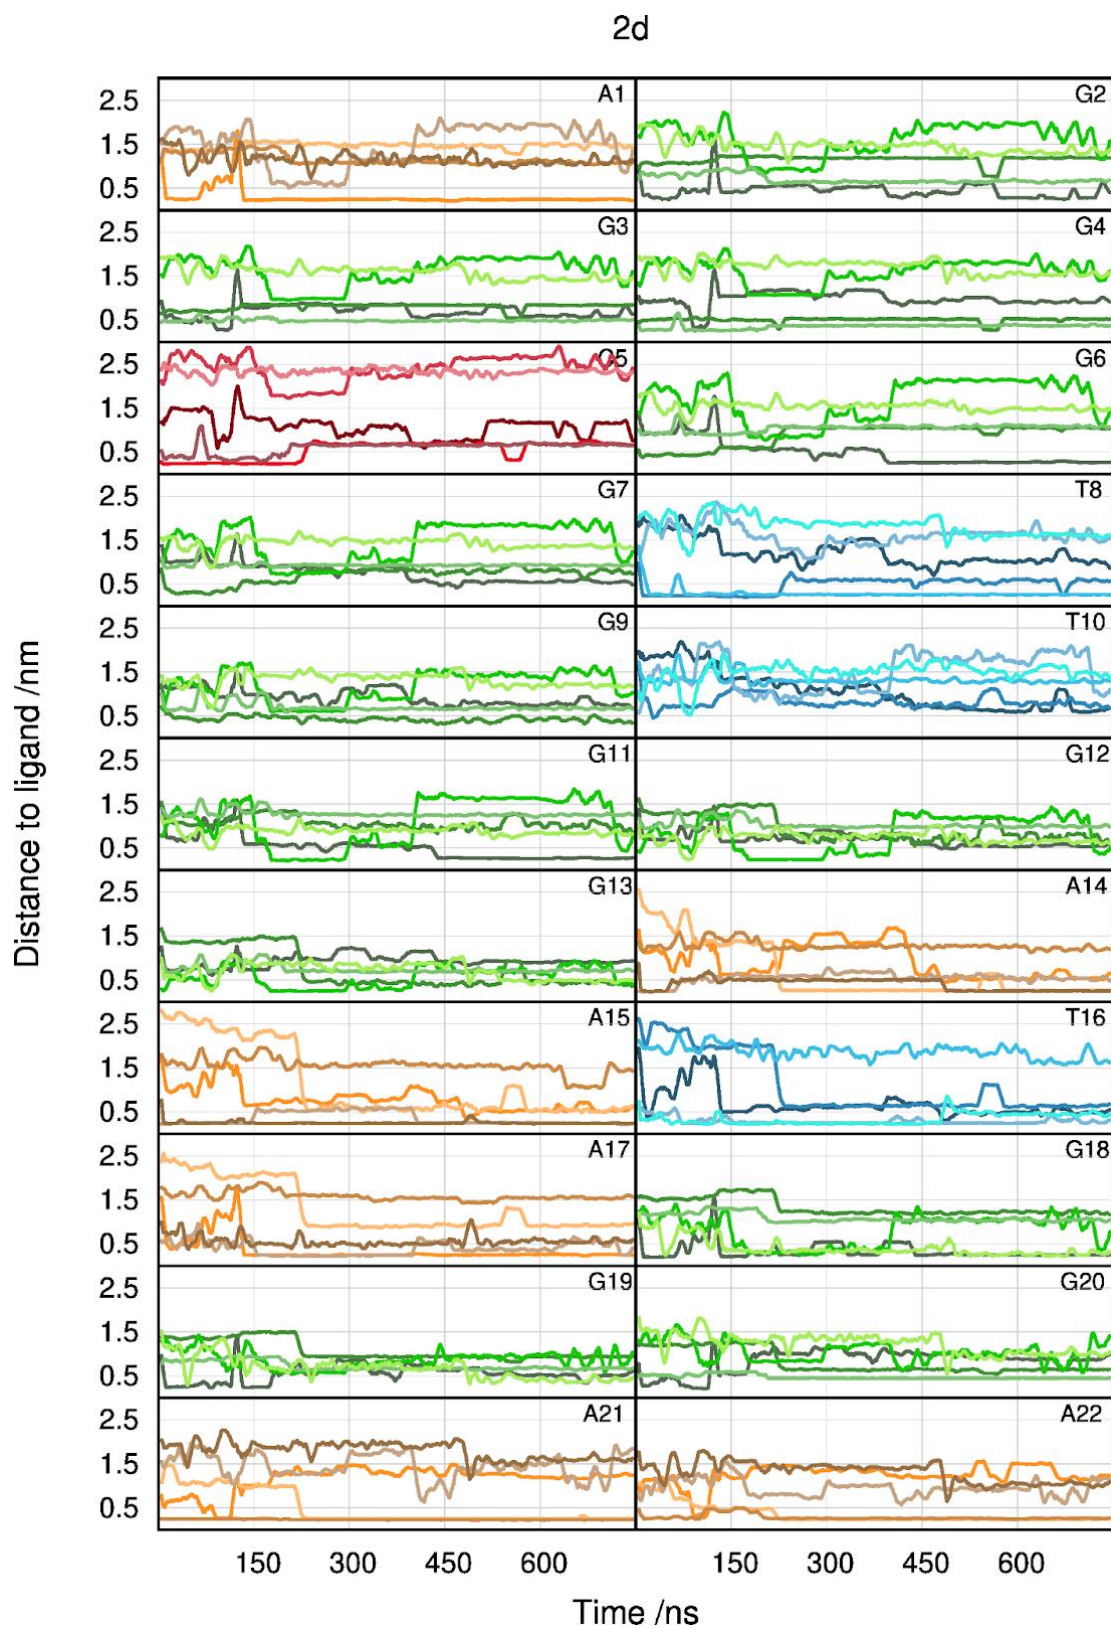

Figure S14. Minimum distance of compound 2d to each pair of bases of k-RAS for all replicate simulations.

## 6. NMR spectra

NMR-Spectra were recorded on a Bruker 300 Ultrashield 300MHz, using 300MHz scan for  $^1\text{H}$ -NMR spectra and 75 MHz for  $^{13}\text{C}$ .

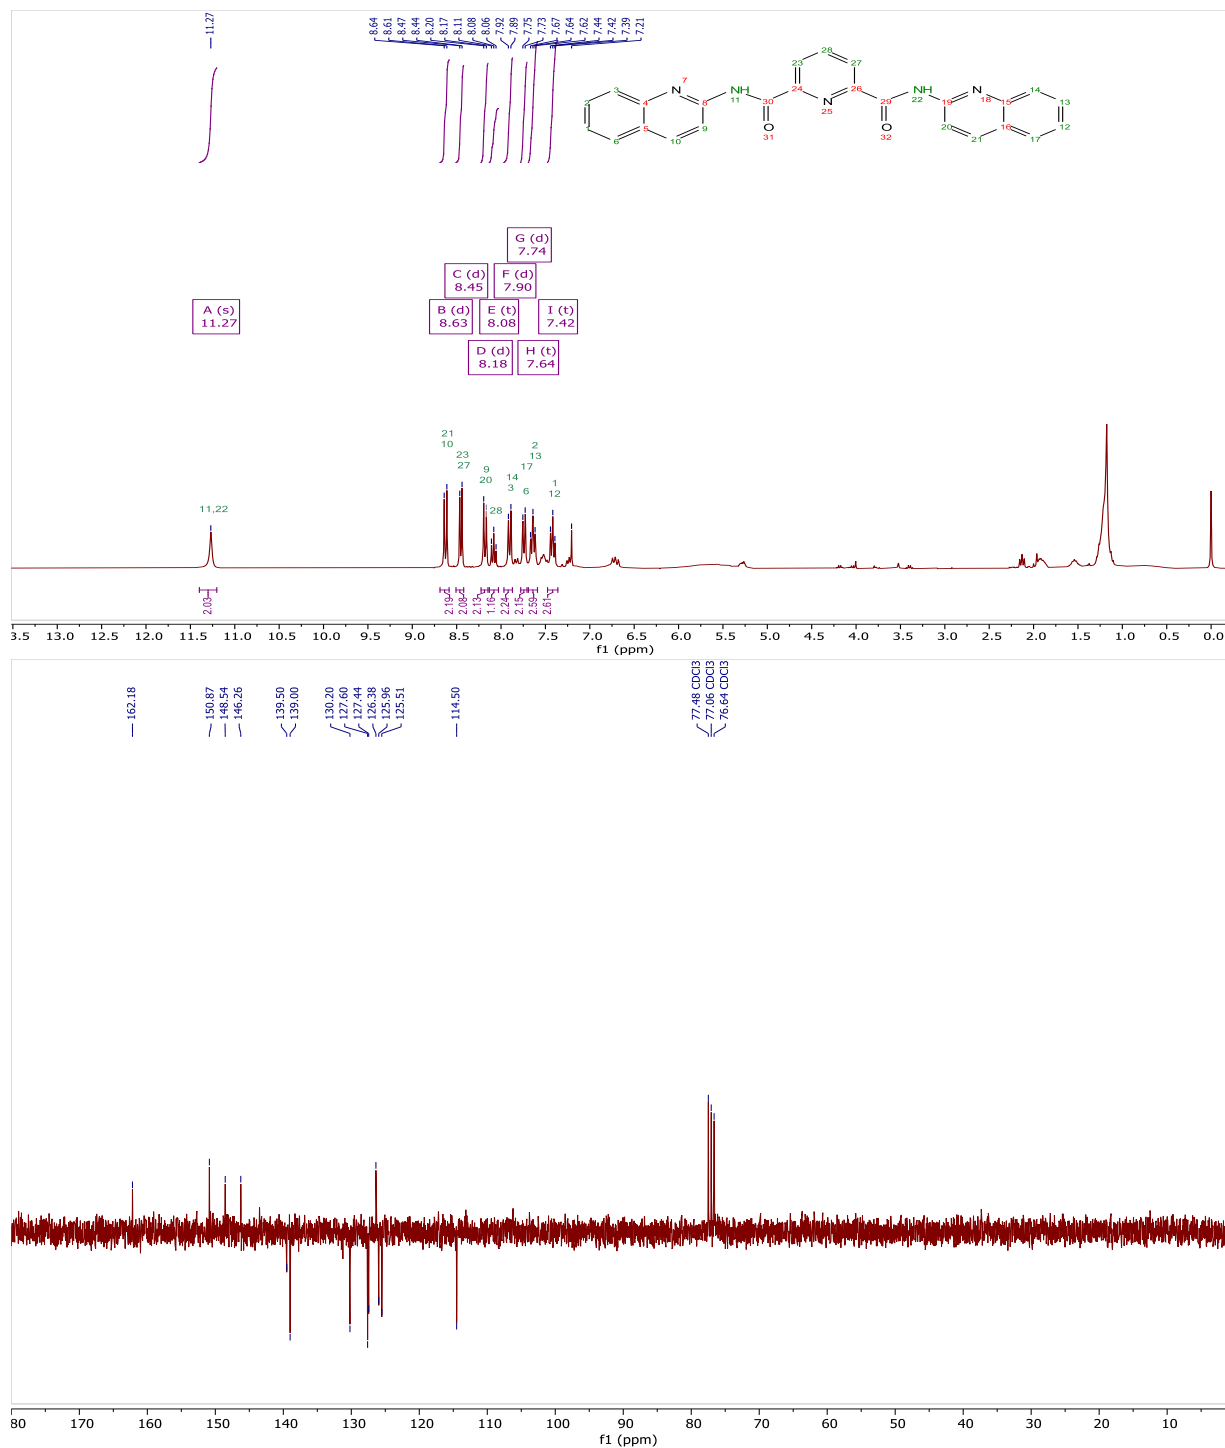

Figure S15.  $^1\text{H}$ -NMR (top) and  $^{13}\text{C}$ -NMR (bottom) spectra of compound **1a**.

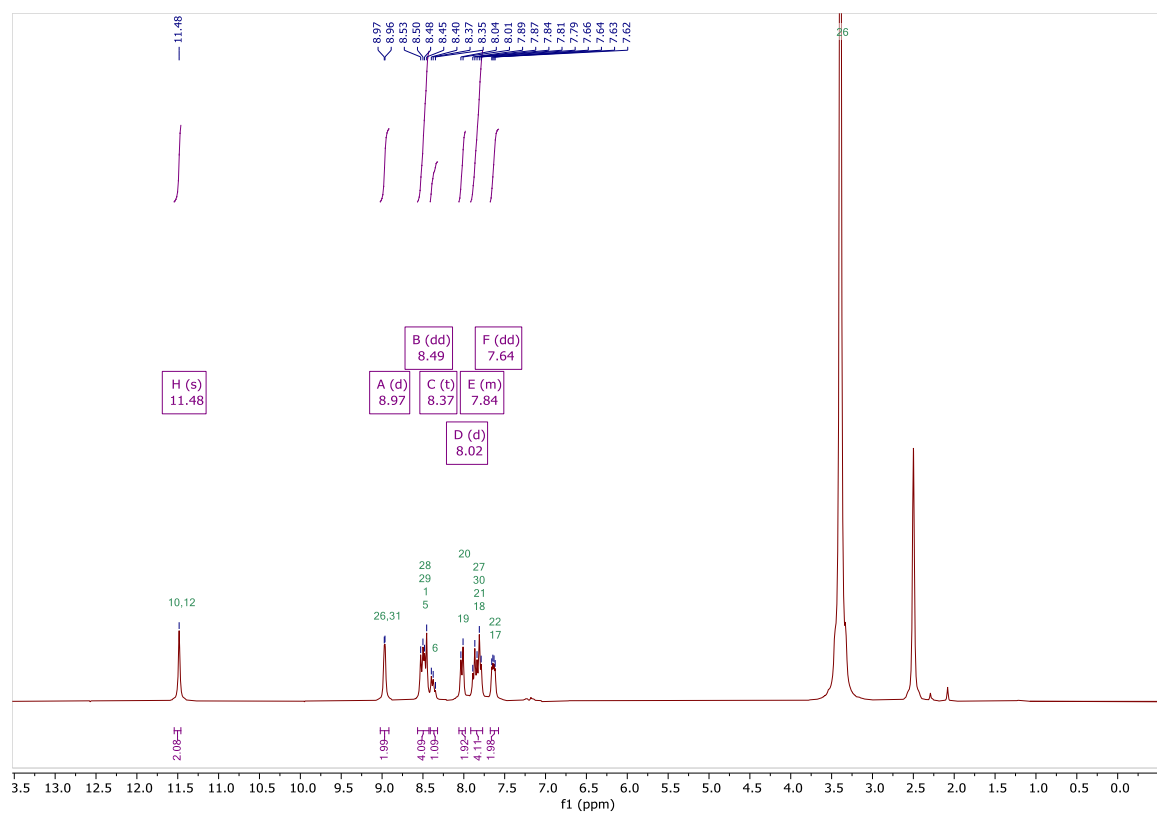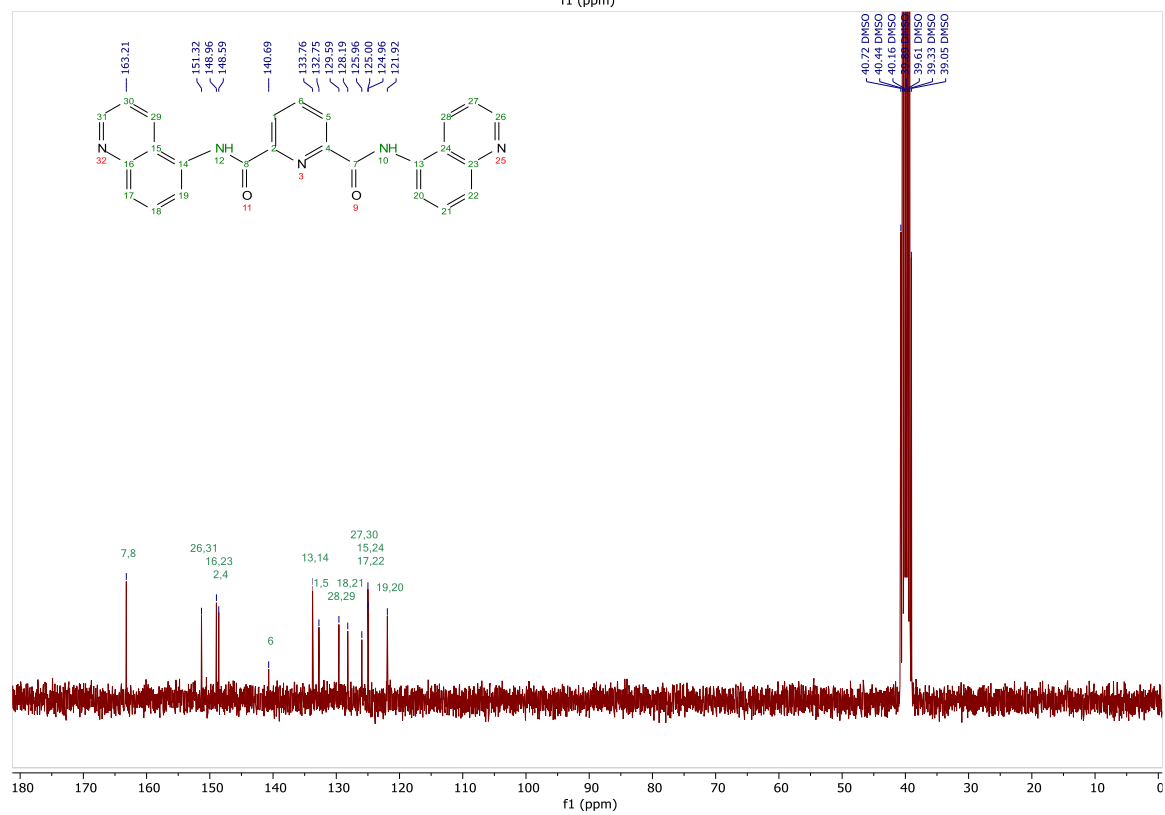

Figure S16. <sup>1</sup>H-NMR (top) and <sup>13</sup>C-NMR (bottom) spectra of compound **1b**.



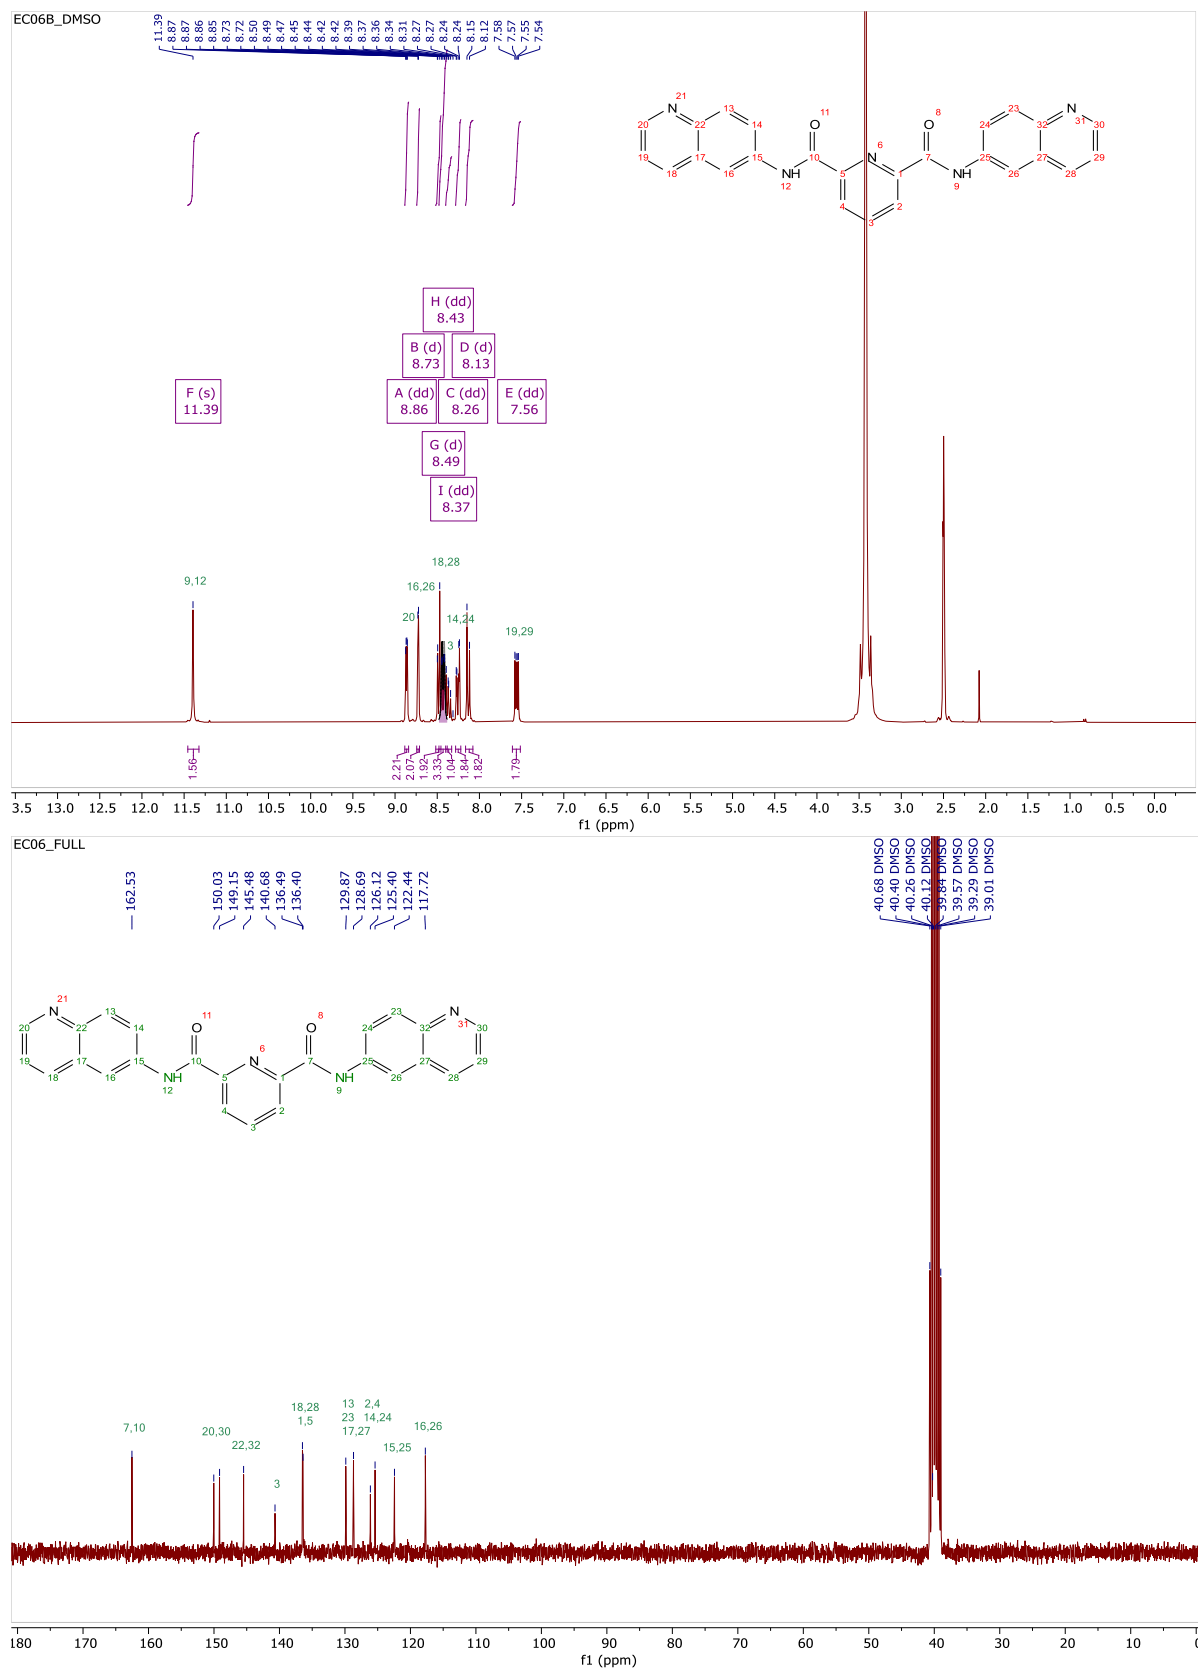

Figure S17.  $^1\text{H}$ -NMR (top) and  $^{13}\text{C}$ -NMR (bottom) spectra of compound **1d**.

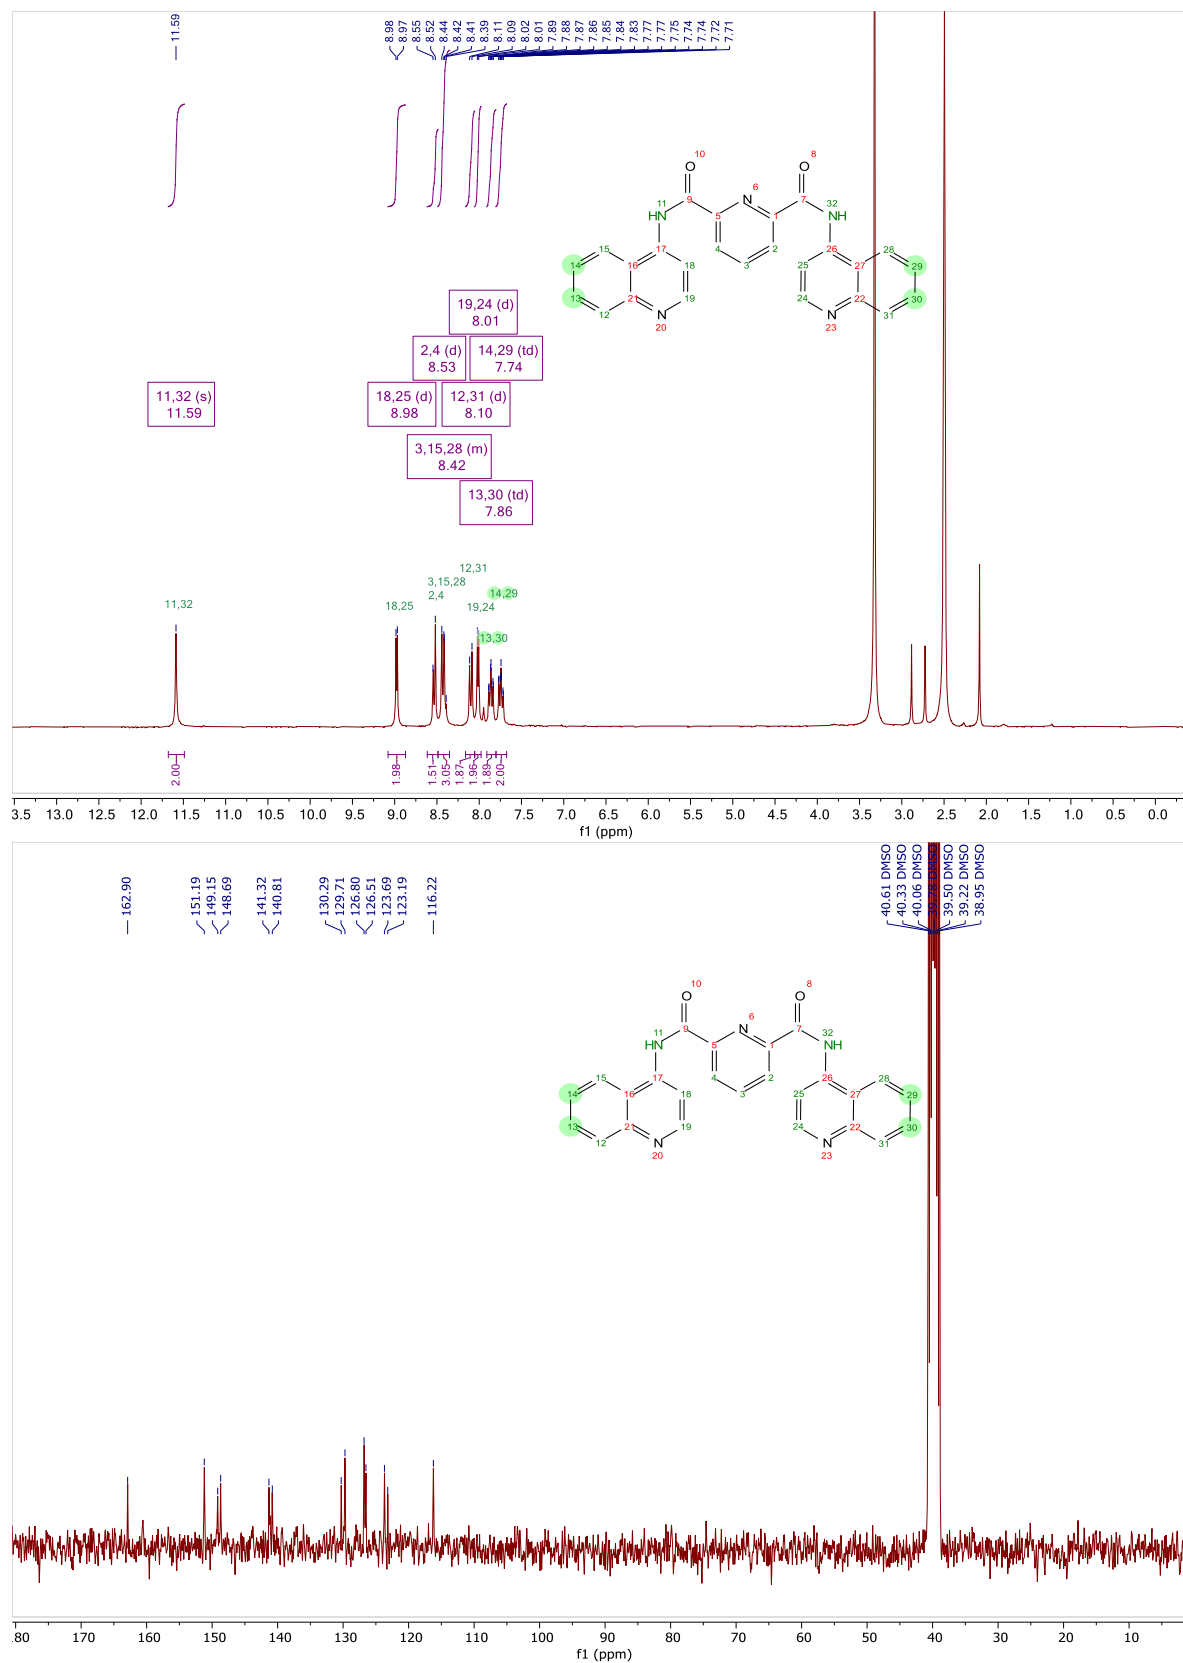

Figure S18. <sup>1</sup>H-NMR (top) and <sup>13</sup>C-NMR (bottom) spectra of compound **1e**.



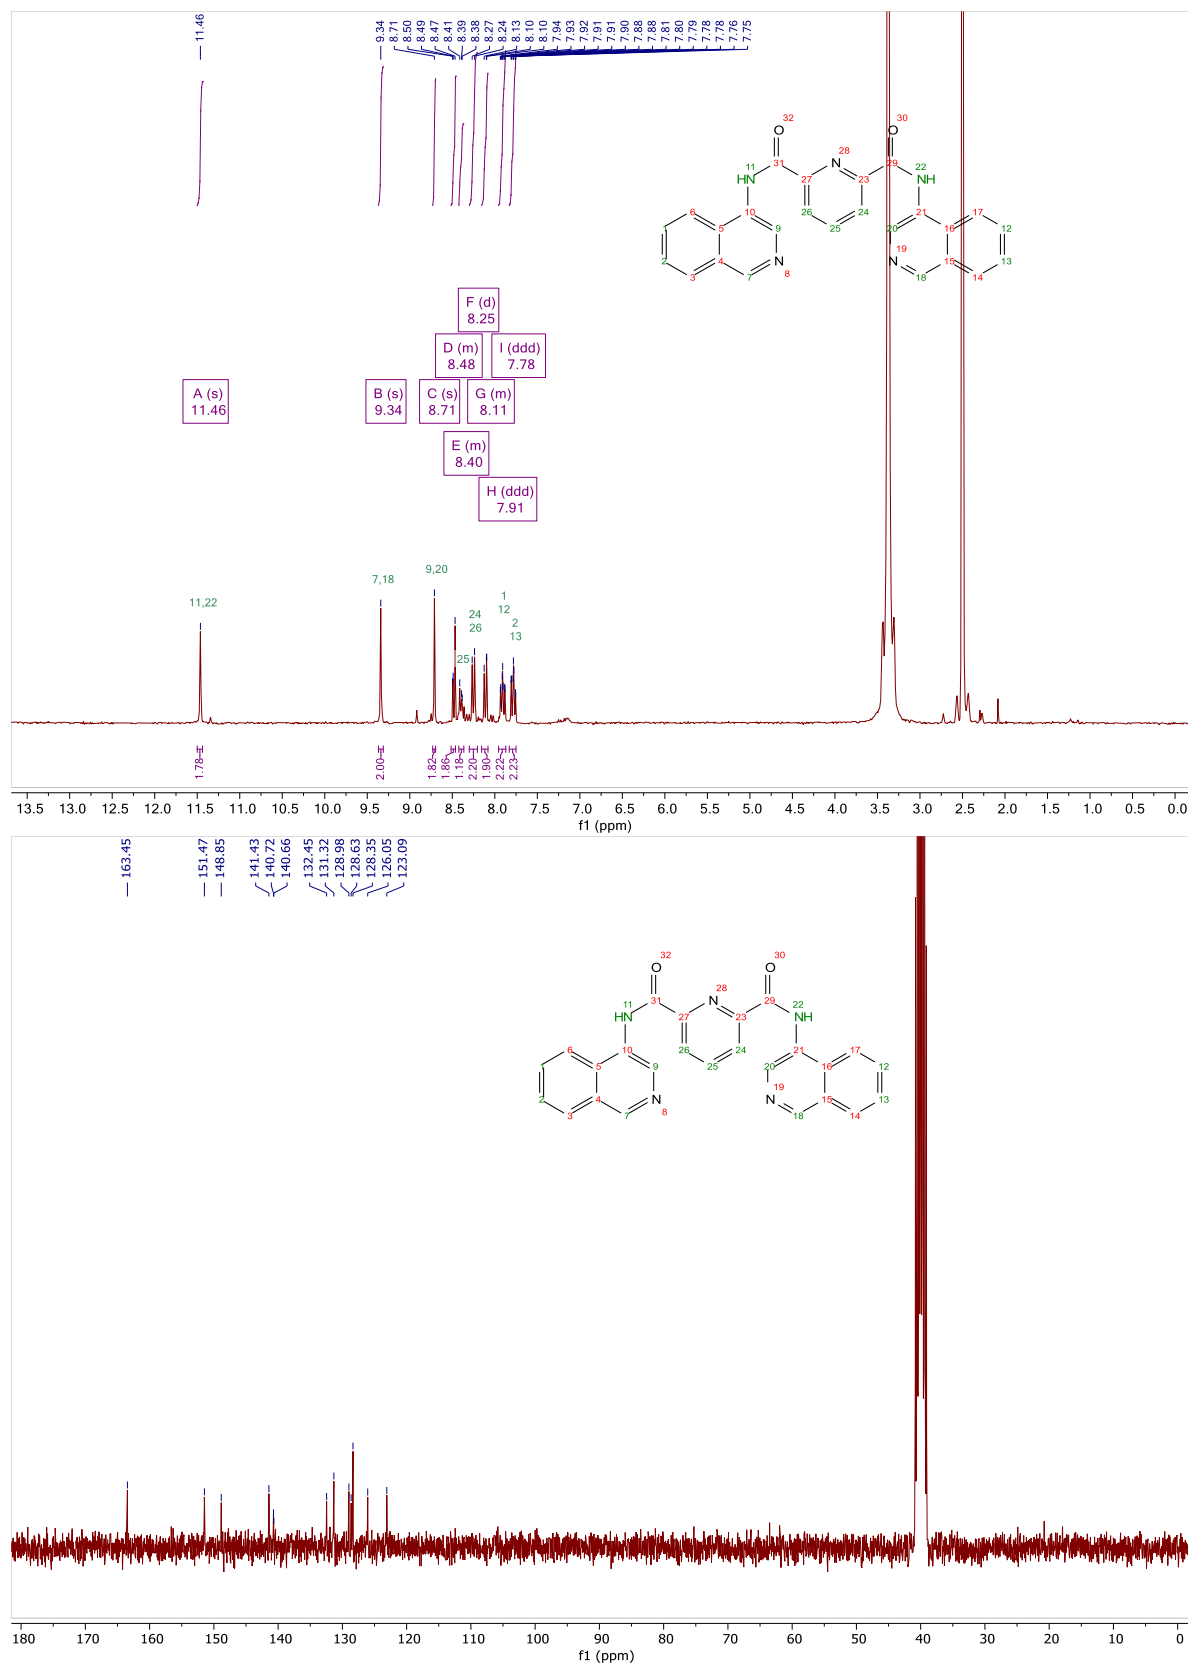

Figure S20. <sup>1</sup>H-NMR (top) and <sup>13</sup>C-NMR (bottom) spectra of compound **1g**.

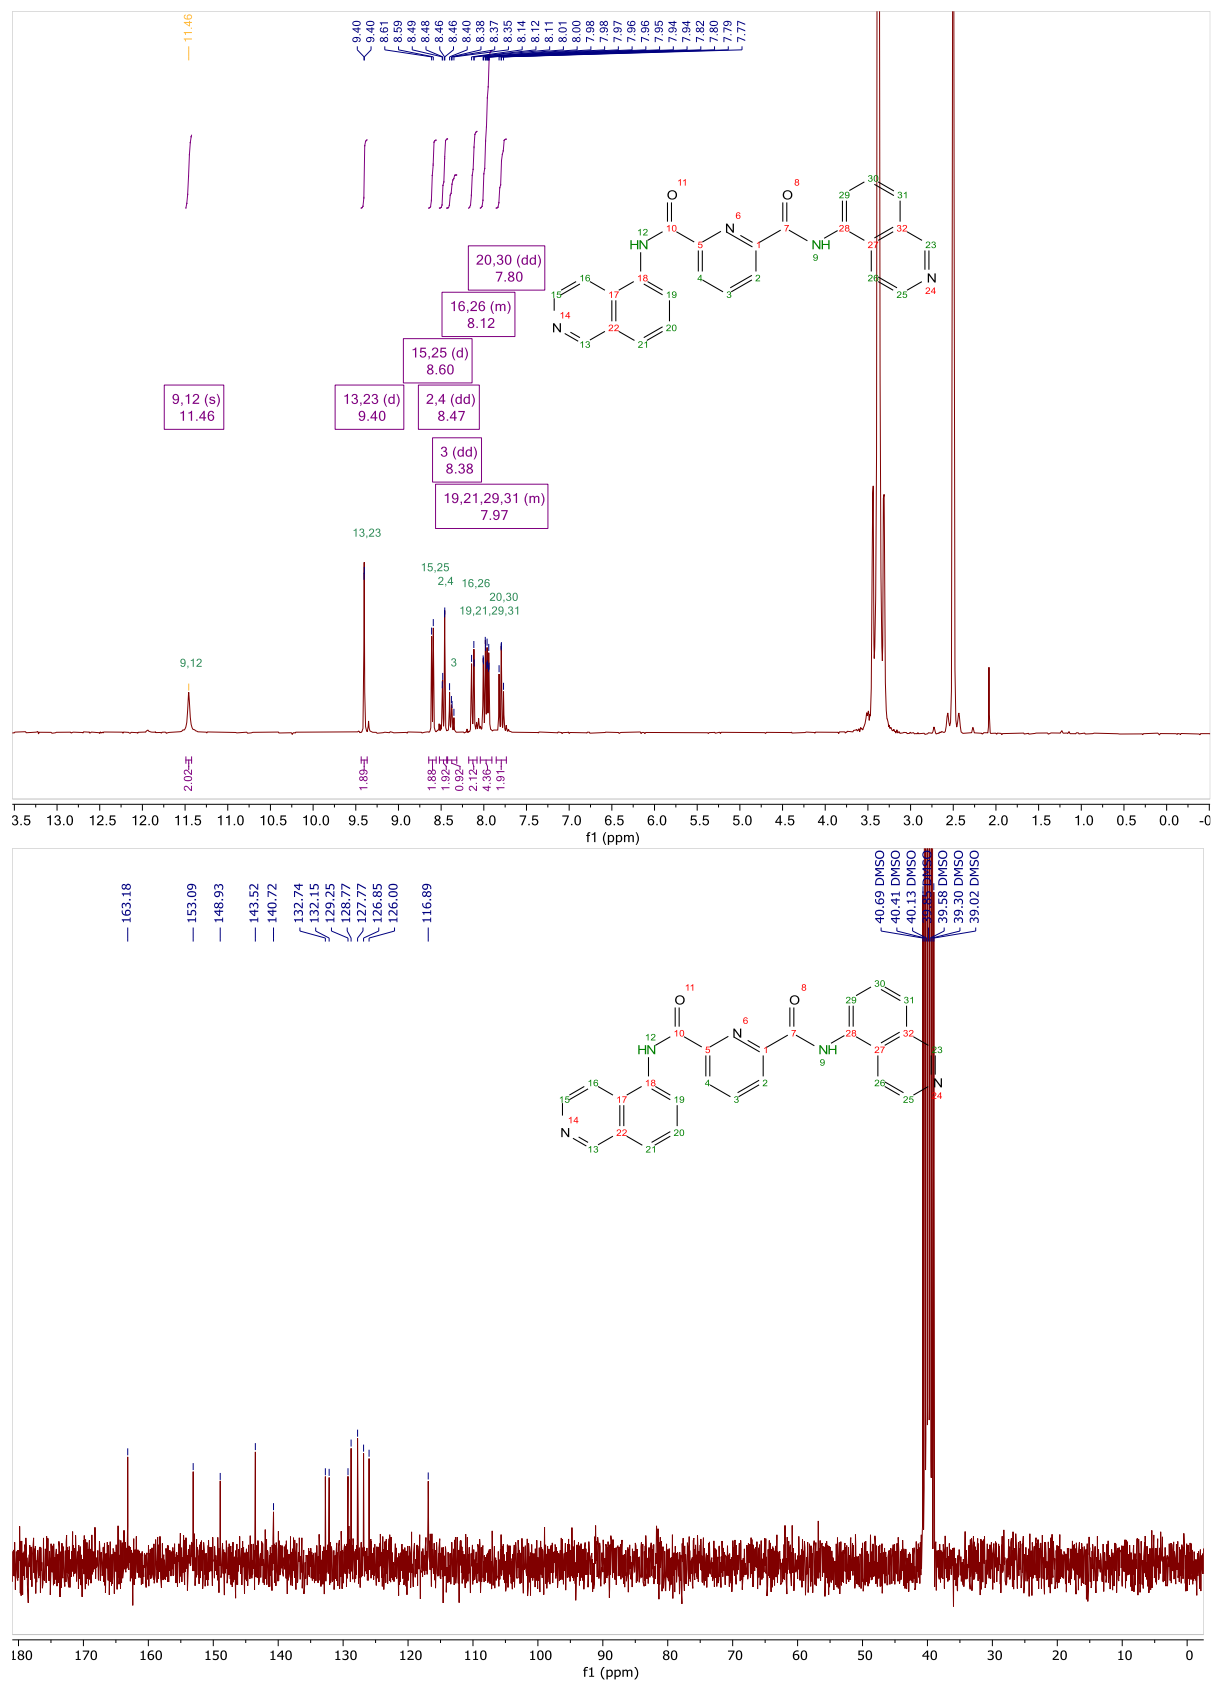

Figure S21. <sup>1</sup>H-NMR (top) and <sup>13</sup>C-NMR (bottom) spectra of compound **1h**.

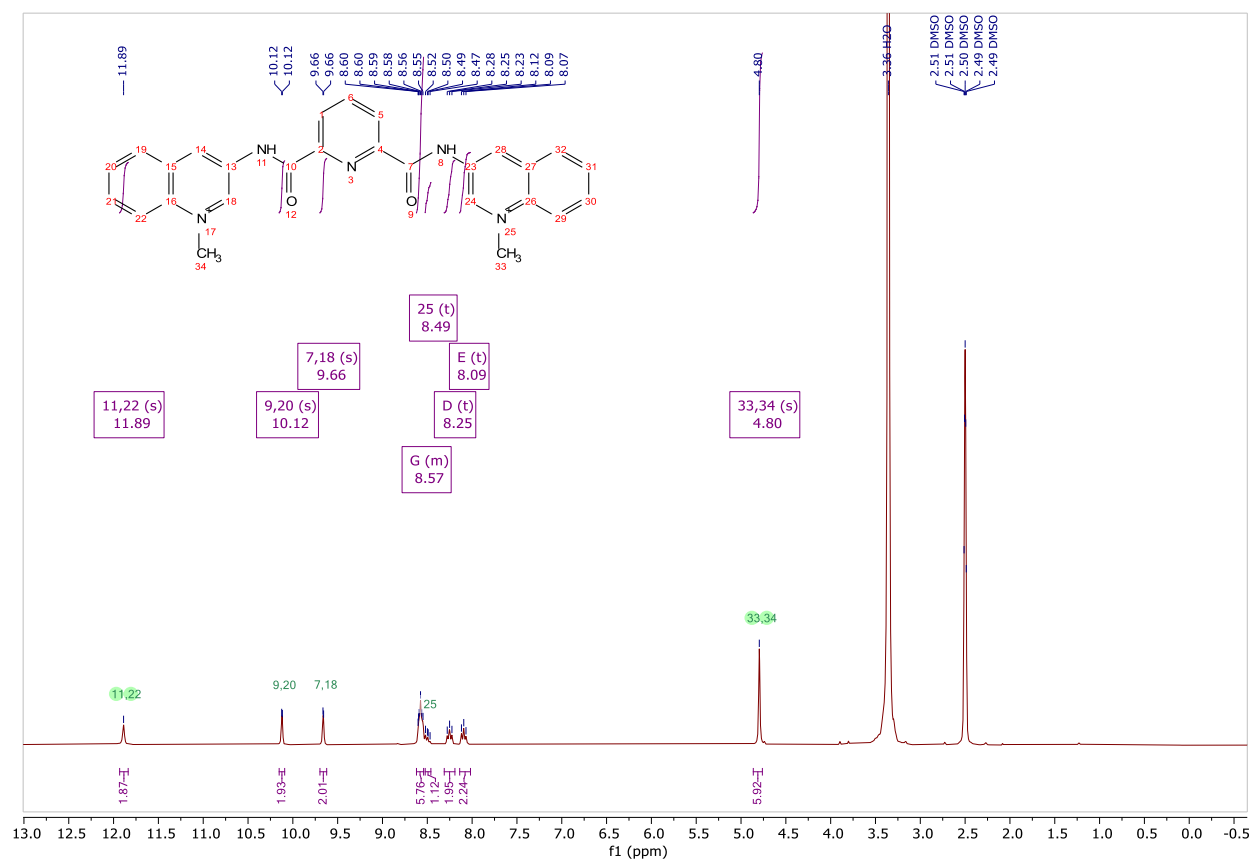

Figure S22. <sup>1</sup>H-NMR Spectrum of **2a**.

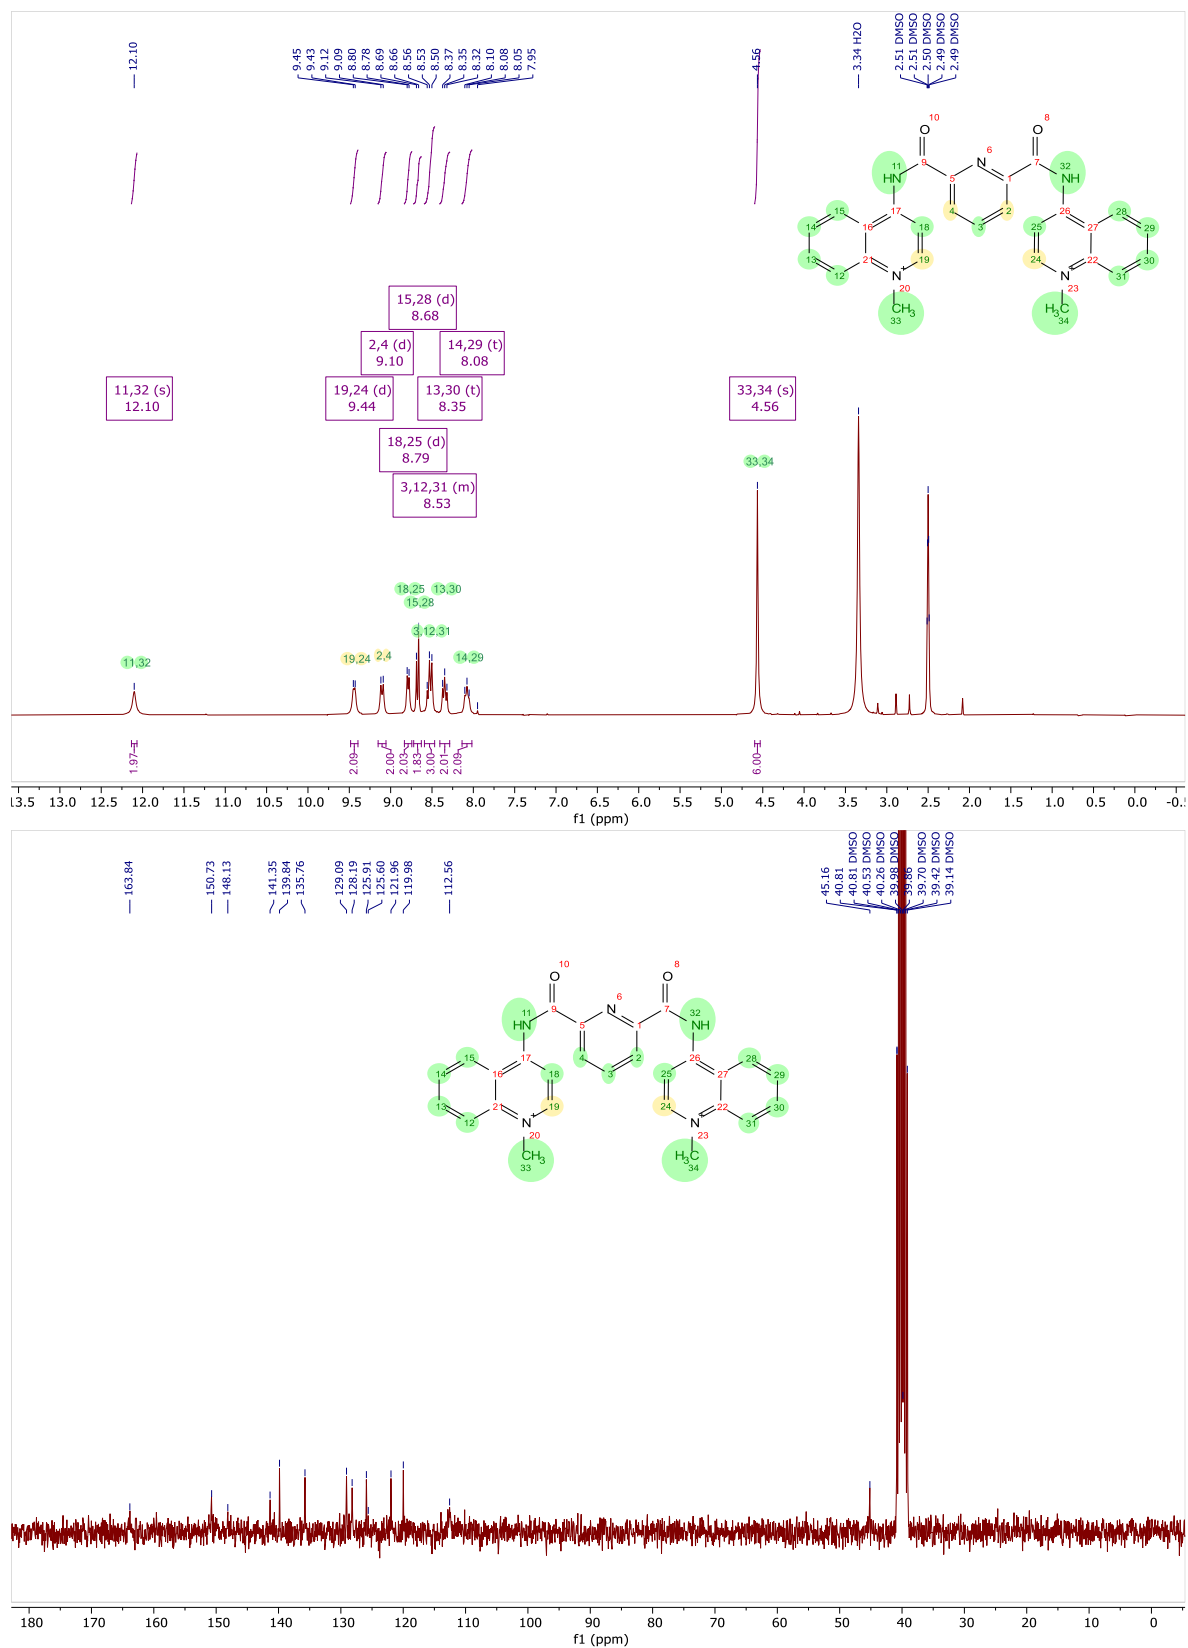

Figure S23. <sup>1</sup>H-NMR (top) and <sup>13</sup>C-NMR (bottom) spectra of compound **2b**.

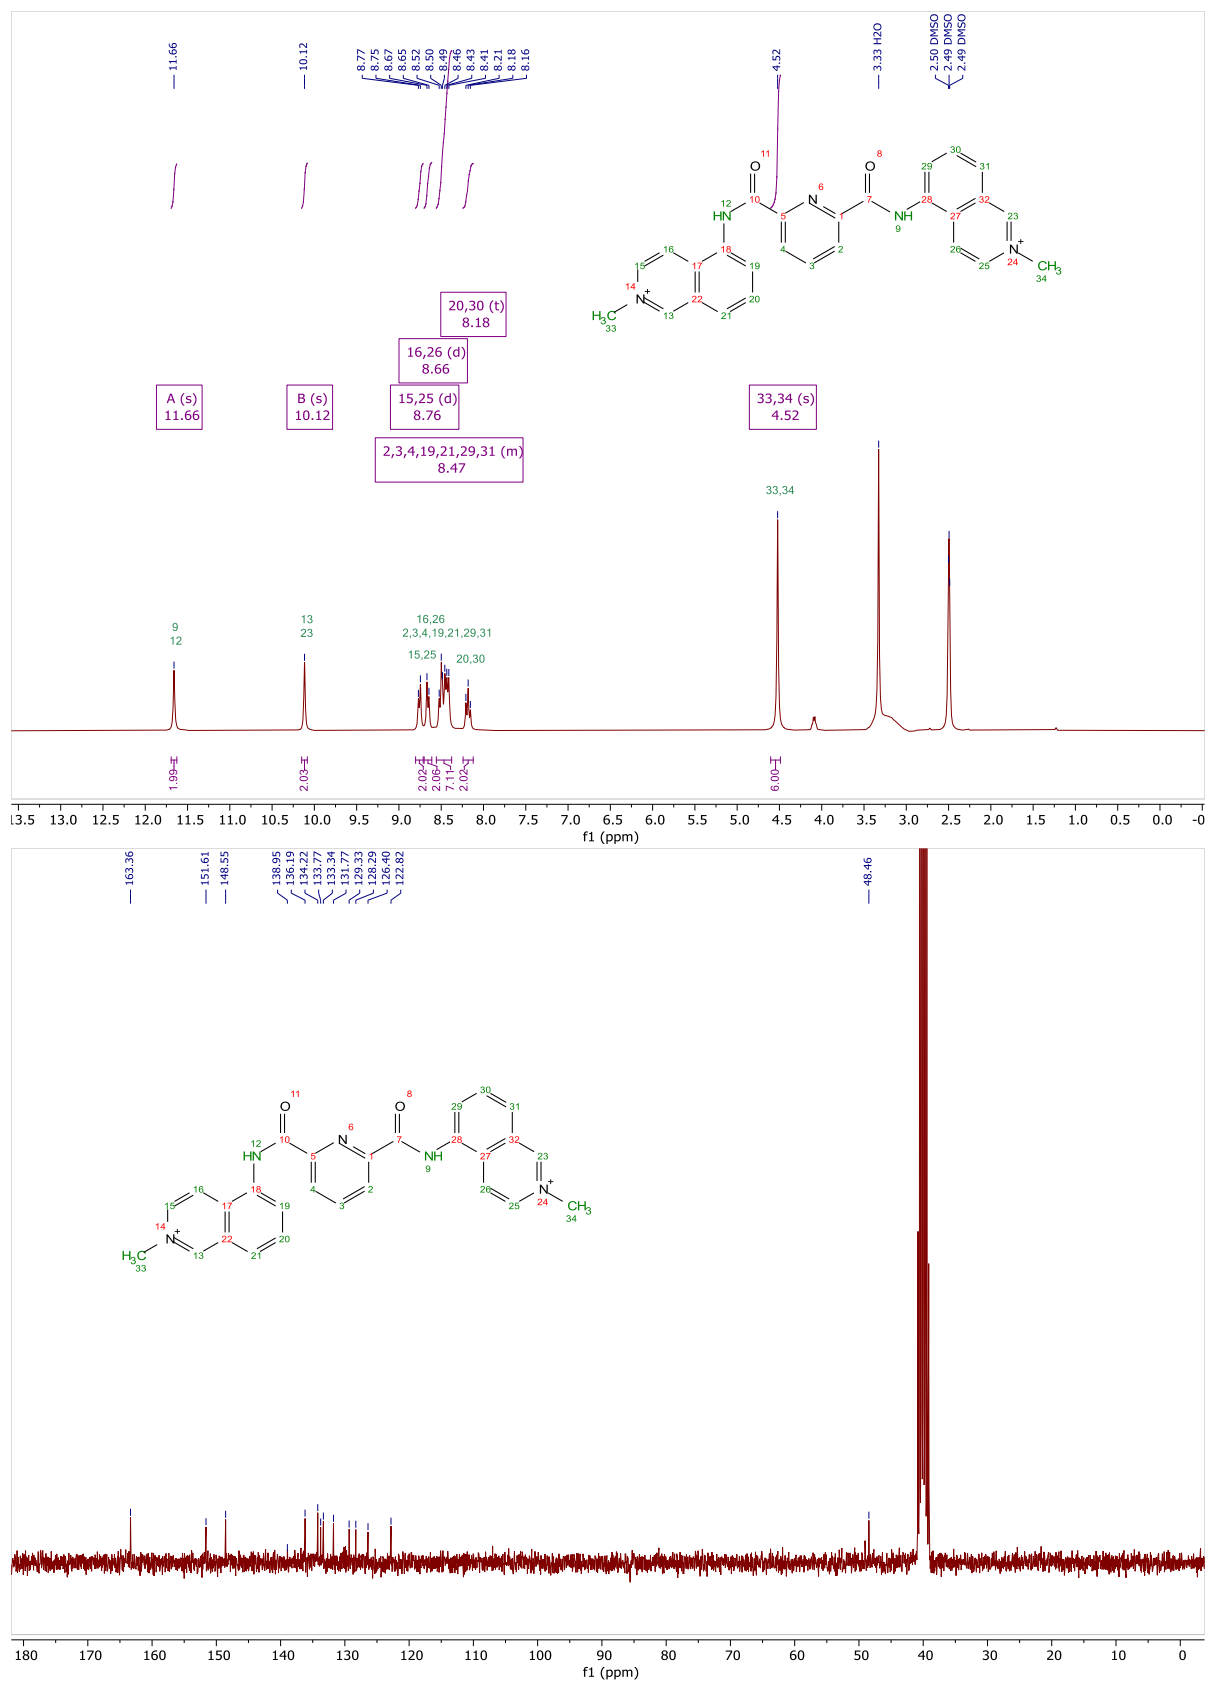

Figure S24. <sup>1</sup>H-NMR (top) and <sup>13</sup>C-NMR (bottom) spectra of compound 2c.



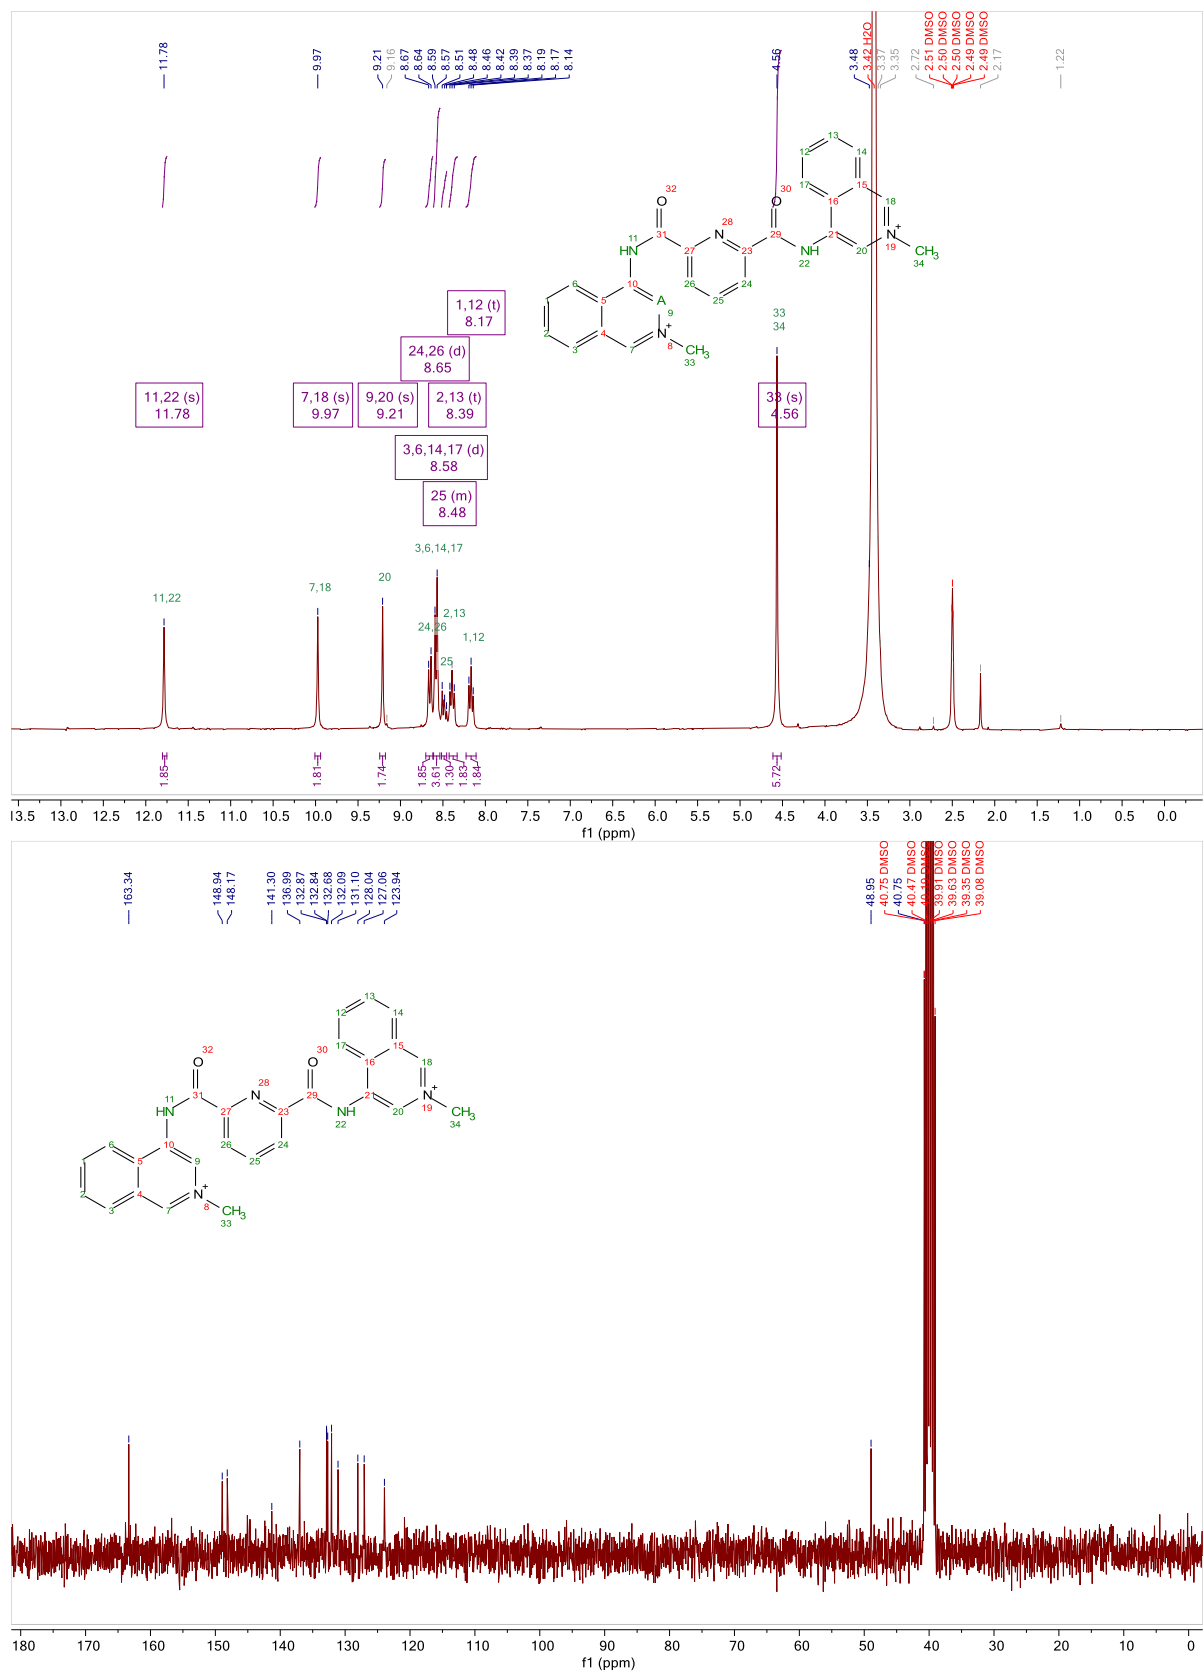

Figure S25. <sup>1</sup>H-NMR (top) and <sup>13</sup>C-NMR (bottom) spectra of compound 2d.

## 7. LC-MS Characterization

### Compound **1a**

Sample 176\_HILIC 2\_ 60%H2O20-Jul-201708:52:32

LCMS serviço 20 julho17\_1

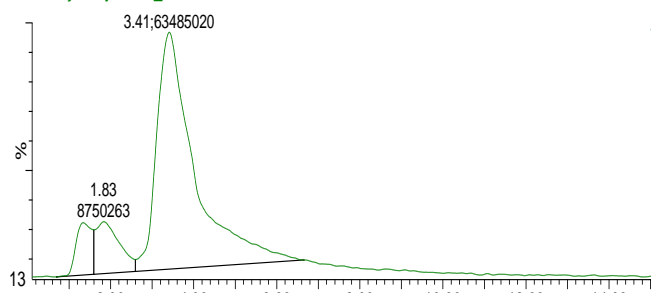

LCMS serviço 20 julho17\_1 194 (3.395) Cm (184:220)

1: Scan ES+ 5.36e6

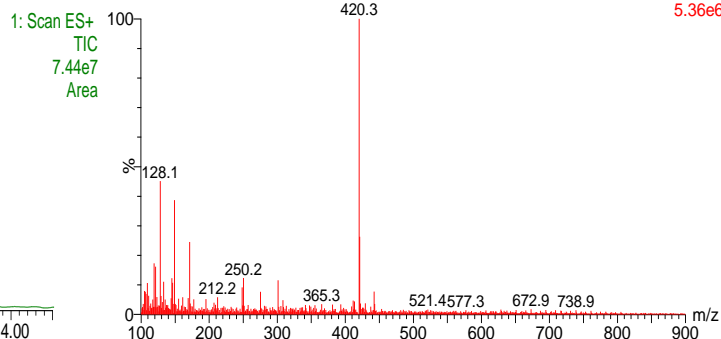

Figure S26. TIC chromatogram of sample **1a** with peak integration. Mass spectrum of compound at RT=3.395 min.

### Compound **1b**.

Sample 177\_HILIC 2\_ 60%H2O19-Jul-201716:05:14

LCMS serviço 19 julho17\_9

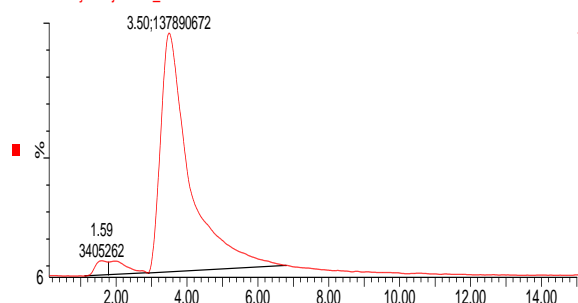

LCMS serviço 19 julho17\_9 201 (3.514) Cm (194:223)

1: Scan ES+ 5.38e7

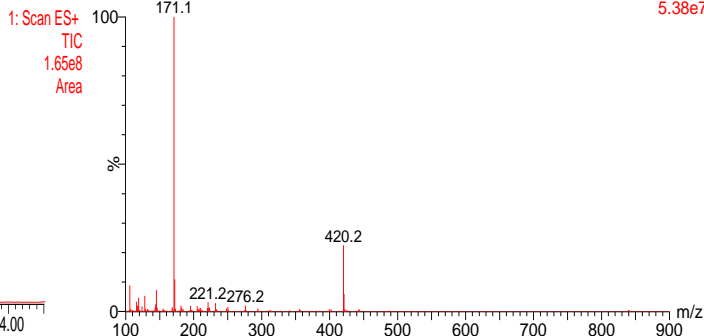

Figure s27. TIC chromatogram of sample **1b** with peak integration. Mass spectrum of compound at RT=3.514 min.

### Compound **1c**.

Sample 178\_HILIC 2\_ 60%H2O19-Jul-201716:22:05

LCMS serviço 19 julho17\_10

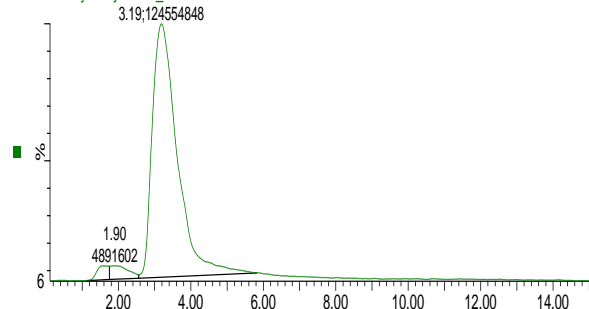

LCMS serviço 19 julho17\_10 183 (3.208) Cm (174:207)

1: Scan ES+ 2.41e7

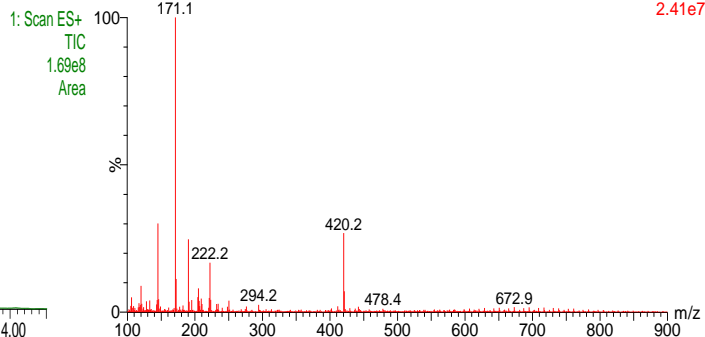

Figure s28. TIC chromatogram of sample **1c** with peak integration. Mass spectrum of compound at RT=3.208 min.

### Compound **1d**.

Sample 179\_HILIC 2\_ 60%H2O19-Jul-201716:38:56

LCMS serviço 19 julho17\_11

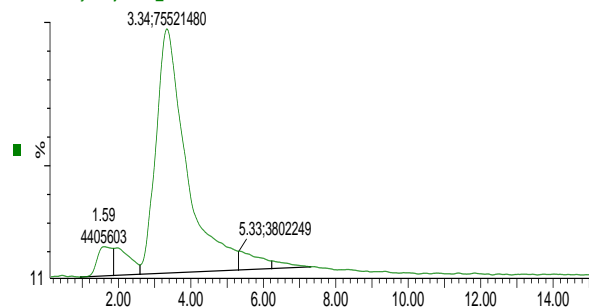

LCMS serviço 19 julho17\_11 190 (3.327) Cm (180:211)

1: Scan ES+  
8.68e6

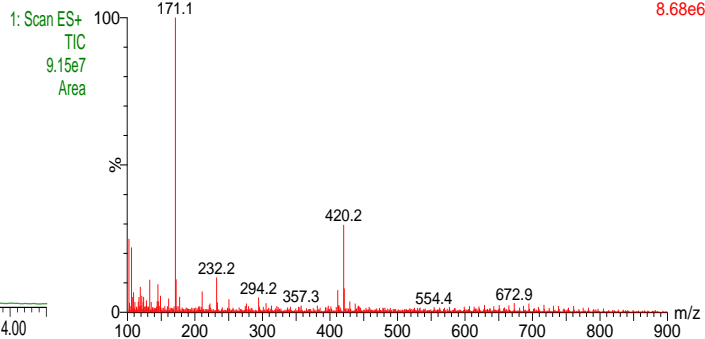

Figure s29. TIC chromatogram of sample **1d** with peak integration. Mass spectrum of compound at RT=3.327 min.

### Compound **1e**.

Sample 180\_HILIC 2\_ 60%H2O19-Jul-201716:55:47

LCMS serviço 19 julho17\_12

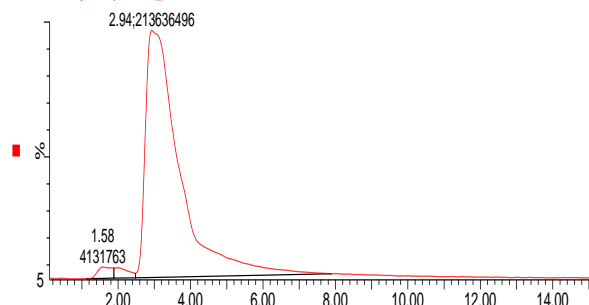

Sample 180\_HILIC 2\_ 60%H2O

LCMS serviço 19 julho17\_12 167 (2.936) Cm (166:187)

1: Scan ES+  
4.43e7

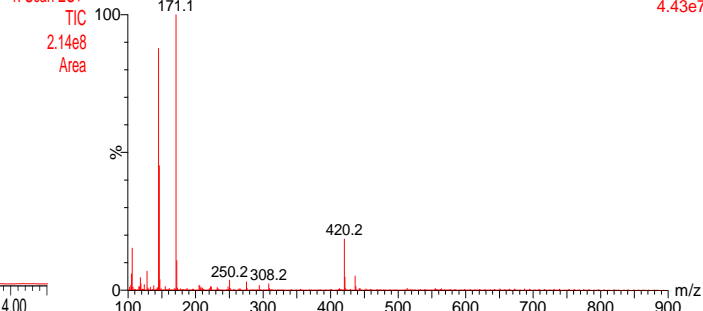

Figure s30. TIC chromatogram of sample **1e** with peak integration. Mass spectrum of compound at RT=2.936 min.

### Compound **1f**.

Sample 183\_HILIC 2\_ 60%H2O19-Jul-201717:46:19

LCMS serviço 19 julho17\_15

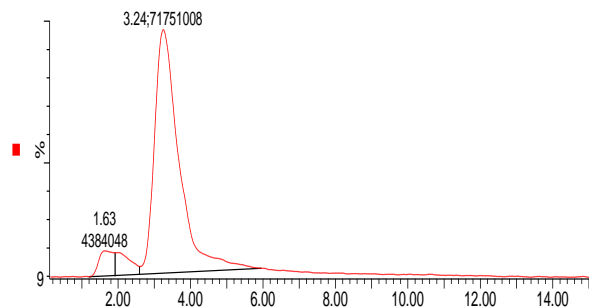

LCMS serviço 19 julho17\_15 185 (3.242) Cm (181:203)

1: Scan ES+  
8.04e6

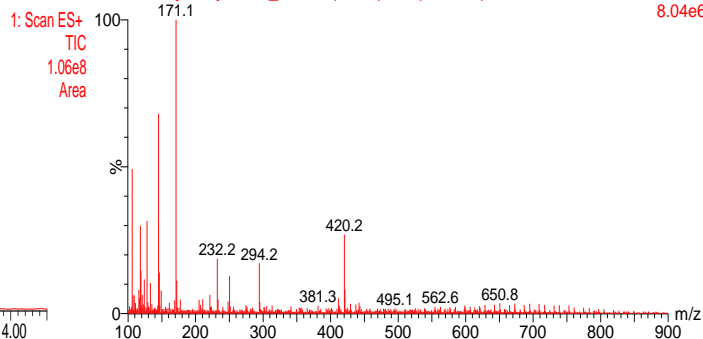

Figure s31. TIC chromatogram of sample **1f** with peak integration. Mass spectrum of compound at RT=3.242 min.

## Compound **1g**.

Sample 185\_HILIC 2\_ 60%H2O19-Jul-201718:20:01

LCMS serviço 19 julho17\_17

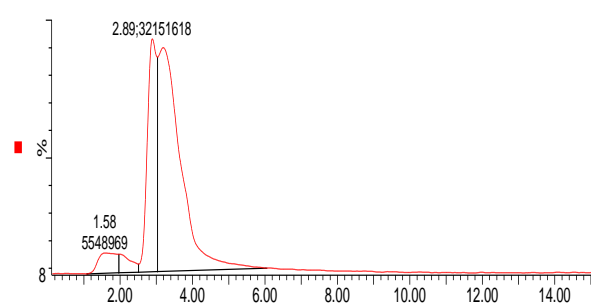

LCMS serviço 19 julho17\_17 180 (3.157) Cm (180:184)

1: Scan ES+

TIC

1.26e8

Area

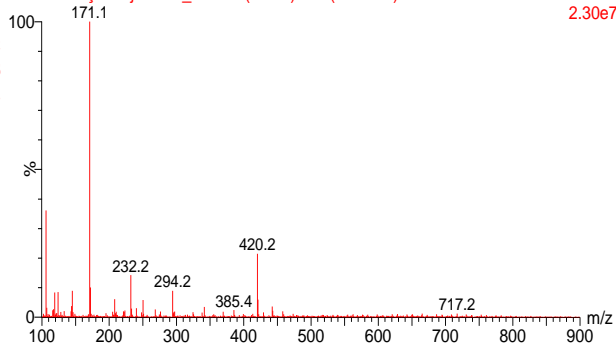

1: Scan ES+  
2.30e7

Figure s32. TIC chromatogram of sample **1g** with peak integration. Mass spectrum of compound at RT=3.157 min.

## Compound **1h**.

Sample 184\_HILIC 2\_ 60%H2O19-Jul-201718:03:10

LCMS serviço 19 julho17\_16

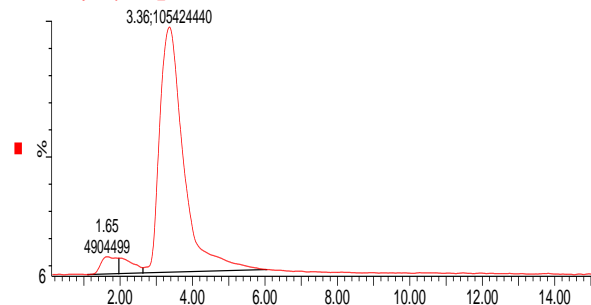

MS serviço 7 julho17\_28 26 (0.541) Cm (20:31)

1: Scan ES+

TIC

1.52e8

Area

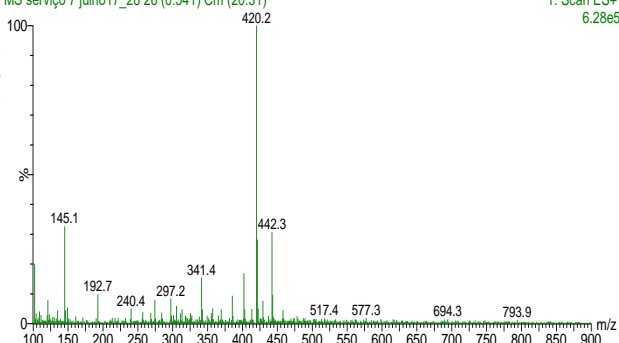

1: Scan ES+  
6.28e5

Figure s33. TIC chromatogram of sample **1h** with peak integration. Mass spectrum of compound at RT=3.365 min.

## Compound 2a.

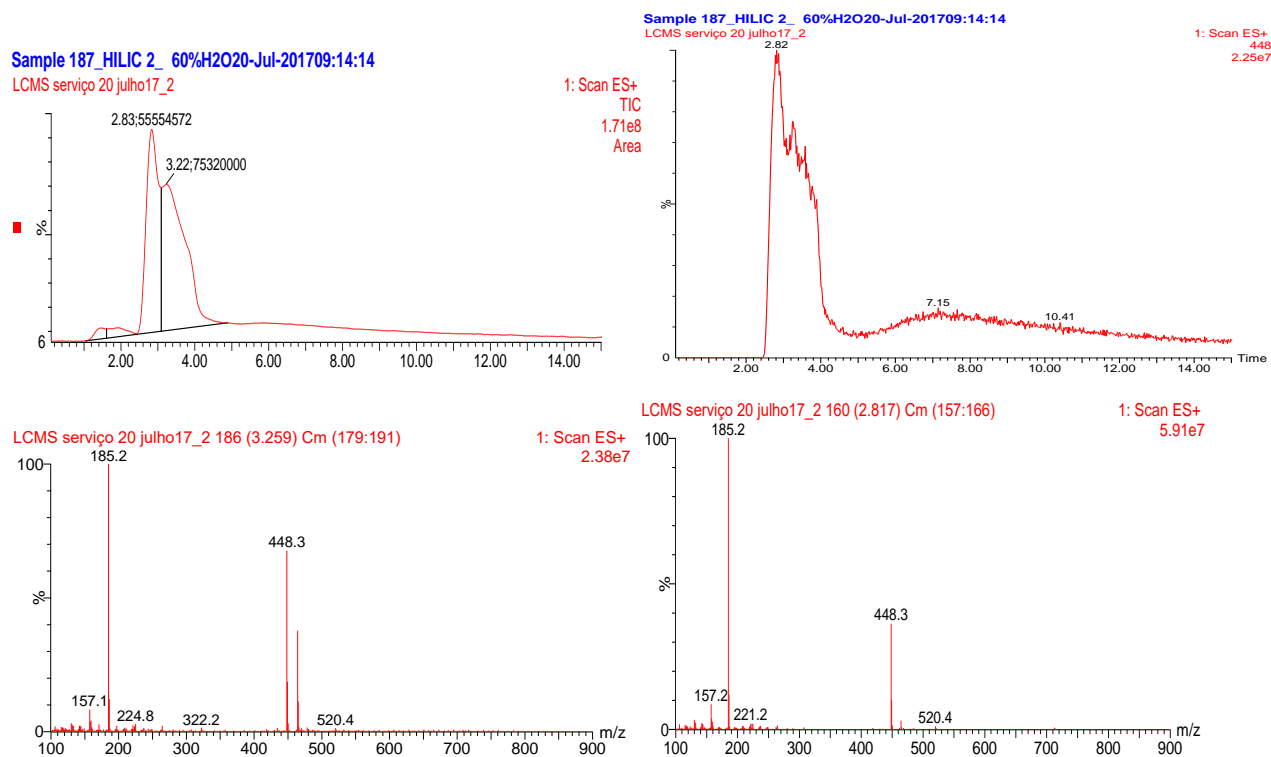

Figure s34. TIC chromatogram of sample **2a** with peak integration (top left). Extracted chromatogram for ion at  $m/z$  448 (top right). Mass spectra of compounds at  $RT=3.259$  min (bottom left) and  $RT=2.817$  min (bottom right)

## Compound 2b.

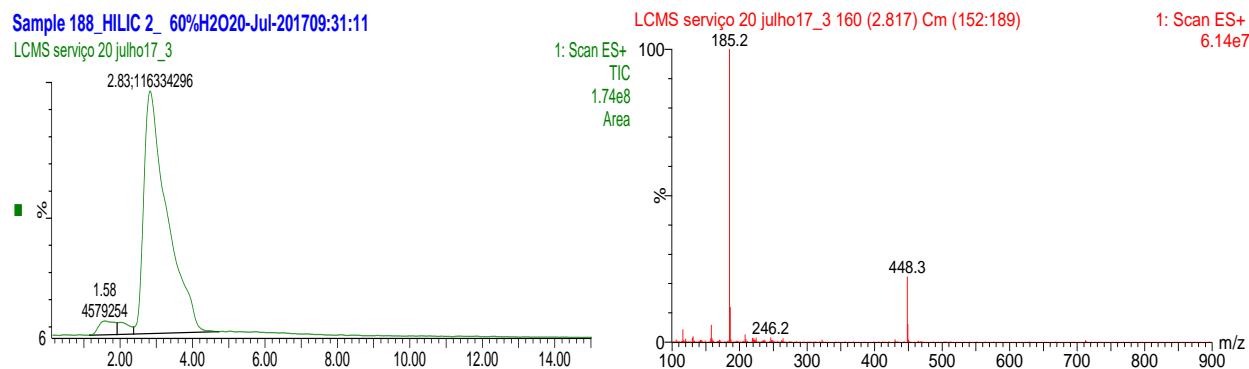

Figure s35. TIC chromatogram of sample **2b** with peak integration. Mass spectrum of compound at  $RT=2.817$  min.

## Compound 2c.

Sample 189\_HILIC 2\_ 60%H2O20-Jul-201709:48:02

LCMS serviço 20 julho17\_4

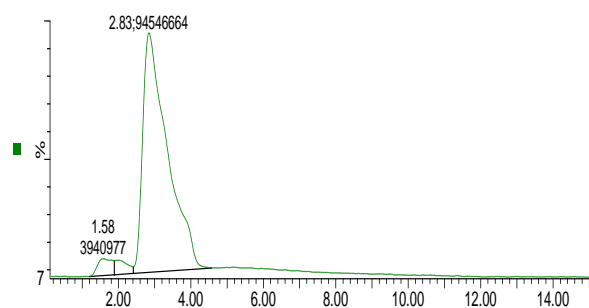

LCMS serviço 20 julho17\_4 161 (2.834) Cm (156:199)

1: Scan ES+  
3.35e7

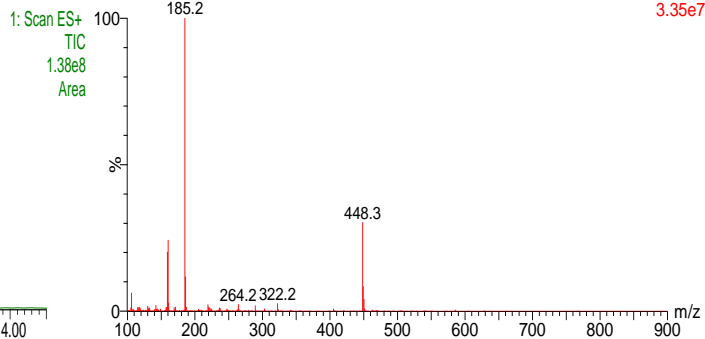

Figure s36. TIC chromatogram of sample 2c with peak integration. Mass spectrum of compound at RT=2.834 min.

## Compound 2d.

Sample 190\_HILIC 2\_ 60%H2O20-Jul-201710:04:53

LCMS serviço 20 julho17\_5

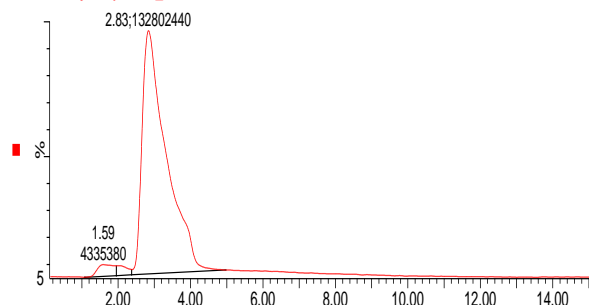

LCMS serviço 20 julho17\_5 161 (2.834) Cm (157:181)

1: Scan ES+  
7.03e7

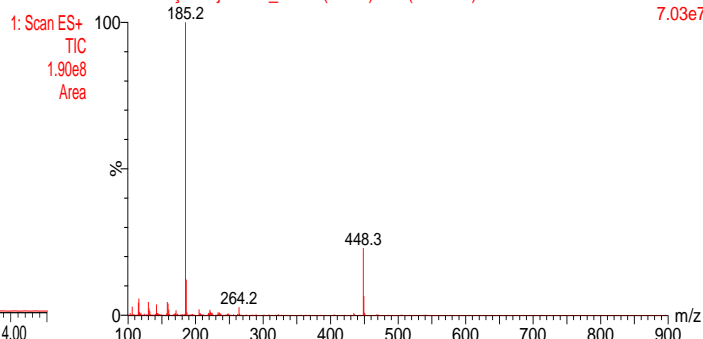

Figure s37. TIC chromatogram of sample 2d with peak integration. Mass spectrum of compound at RT=2.834 min.

## 8. Supplemental references

1. Mendes, E.; Cadoni, E.; Carneiro, F.; Afonso, M.B.; Brito, H.; Lavrado, J.; dos Santos, D.J.V.A.; Vítor, J.B.; Neidle, S.; Rodrigues, C.M.P.; et al. Combining 1,3-ditriazolyl-benzene and quinoline to discover a new G-quadruplex interactive small molecule active against cancer stem-like cells. *ChemMedChem* **2019**, cmdc.201900243, doi:10.1002/cmdc.201900243.
2. Hou, T.; Wang, J.; Li, Y.; Wang, W. Assessing the Performance of the MM/PBSA and MM/GBSA Methods. 1. The Accuracy of Binding Free Energy Calculations Based on Molecular Dynamics Simulations. *J. Chem. Inf. Model.* **2011**, 51, 69–82, doi:10.1021/ci100275a.
3. Bondi, A. van der Waals Volumes and Radii. *J. Phys. Chem.* **1964**, 68, 441–451, doi:10.1021/j100785a001.
4. Sitkoff, D.; Sharp, K.A.; Honig, B. Accurate Calculation of Hydration Free Energies Using Macroscopic Solvent Models. *J. Phys. Chem.* **1994**, 98, 1978–1988, doi:10.1021/j100058a043.
